# 1 Enhanced lipogenesis through Ppar $\gamma$ helps cavefish adapt to food scarcity.

2

3 Shaolei Xiong<sup>1</sup>, Wei Wang<sup>1,2,3</sup>, Alexander Kenzior<sup>1</sup>, Luke Olsen<sup>1,4</sup>, Jaya Krishnan<sup>1</sup>, Jenna Persons<sup>1</sup>,  
4 Kyle Medley<sup>1</sup>, Robert Peuß<sup>1,5</sup>, Yongfu Wang<sup>1</sup>, Shiyuan Chen<sup>1</sup>, Ning Zhang<sup>1</sup>, Nancy Thomas<sup>1</sup>,  
5 John M. Miles<sup>6</sup>, Alejandro Sánchez Alvarado<sup>1,2</sup>, Nicolas Rohner<sup>1,4</sup>

6

7 <sup>1</sup> Stowers Institute for Medical Research, Kansas City, MO 64110, USA

8 <sup>2</sup> Howard Hughes Medical Institute, Kansas City, MO 64110, USA

9 <sup>3</sup> National Institute of Biological Sciences, Beijing 102206, China

10 <sup>4</sup> Department of Molecular & Integrative Physiology, University of Kansas Medical Center,  
11 Kansas City, KS 66160, USA

12 <sup>5</sup> Institute for Evolution and Biodiversity, University of Münster, Münster 48149, Germany

13 <sup>6</sup> Department of Medicine, Division of Metabolism, Endocrinology & Genetics, University of  
14 Kansas Medical Center, Kansas City, KS 66160, USA

15

16

## 17 **Abstract**

18 Nutrient availability varies seasonally and spatially in the wild. The resulting nutrient limitation or  
19 restricted access to nutrients pose a major challenge for every organism. While many animals, such  
20 as hibernating animals, evolved strategies to overcome periods of nutrient scarcity, the cellular  
21 mechanisms of these strategies are poorly understood. Cave environments represent an extreme  
22 example of nutrient deprived environments since the lack of sunlight and therefore primary energy  
23 production drastically diminishes the nutrient availability. Here, we used *Astyanax mexicanus*,  
24 which includes river-dwelling surface fish and cave adapted cavefish populations to study the  
25 genetic adaptation to nutrient limitations. We show that cavefish populations store large amounts  
26 of fat in different body regions when fed ad libitum in the lab. We found higher expression of  
27 lipogenesis genes in cavefish livers when fed the same amount of food as surface fish, suggesting  
28 an improved ability of cavefish to use lipogenesis to convert available energy into triglycerides for  
29 storage into adipose tissue. Moreover, the lipid metabolism regulator, Peroxisome proliferator-  
30 activated receptor  $\gamma$  (Ppar $\gamma$ ), is upregulated at both transcript and protein levels in cavefish livers.  
31 Chromatin Immunoprecipitation sequencing (ChIP seq) showed that Ppar $\gamma$  binds cavefish  
32 promoter regions of genes to a higher extent than surface fish. Finally, we identified two possible  
33 regulatory mechanisms of Ppar $\gamma$  in cavefish: higher amounts of ligands of the nuclear receptor,  
34 and nonsense mutations in *per2*, a known repressor of Ppar $\gamma$ . Taken together, our study reveals

35 that upregulated Ppar $\gamma$  promotes higher levels of lipogenesis in the liver and contributes to higher  
36 body fat accumulation in cavefish populations, an important adaptation to nutrient limited  
37 environments.

38

## 39 **Introduction**

40 Nutrient availability can vary greatly throughout the year. To adapt to periods of dearth, most  
41 animals will store excess energy in the form of fat when food is available and utilize these fat  
42 storages when food is scarce. Such fat gains can be impressive. Brown bears can gain up to 180  
43 kg of weight, most of it as fat, in the few summer months before hibernation (Kingsley et al.,  
44 1983), and migrating birds can build up fat stores that make up to 50% of their bodyweight before  
45 migrating (Blem, 1976). Other extreme examples are found in cave animals. Due to the lack of  
46 sunlight and therefore primary production, cave habitats rely on nutrients that originate outside of  
47 the caves and are transported only occasionally into the cave through floods or bat droppings  
48 (Mitchell et al., 1977). One well studied example is the teleost species, *Astyanax mexicanus*.  
49 Previous studies have shown that cavefish populations of this species can gain substantially higher  
50 amounts of total body fat and visceral fat compared to the surface forms of the same species  
51 (Aspiras et al., 2015; Hüppop, 2001; Xiong et al., 2018). Some cavefish populations (*e.g.*, Tinaja  
52 or Molino) achieve fat gain through hyperphagia caused by nonsynonymous mutations in the  
53 melanocortin 4 receptor (*mc4r*) (Aspiras et al., 2015). Notably, the same mutations cause  
54 hyperphagia in humans (Aspiras et al., 2015). However, not all cavefish populations carry these  
55 mutations or display increased appetite. For example, cavefish from the Pachón population carry  
56 the wildtype allele of *mc4r* and display comparable appetites to surface fish (Alie et al., 2018;  
57 Aspiras et al., 2015). Several strategies have been proposed to explain how Pachón gain high body  
58 fat. Pachón develop visceral adipocytes earlier than surface fish (Xiong et al., 2018), their  
59 gastrointestinal tract has higher digestion/absorption efficiency than surface fish (Riddle et al.,  
60 2018), and their skeletal muscle are insulin resistant, a proposed adaptation to the nutrient-limited  
61 environment (Riddle et al., 2018b). However, it is not known whether there are specific cellular  
62 changes to Pachón's lipid metabolism.

63

64 A central metabolic pathway that controls the synthesis of lipids through fatty acid biosynthesis  
65 and triglyceride production in liver and adipose tissue is lipogenesis (Kersten, 2001; Numa and

66 Yamashita, 1974; Wang et al., 2015). In this study, we investigated whether the observed  
67 differences in body fat content between cavefish and surface fish of *A. mexicanus* are related to  
68 changes in lipogenesis. We observed that Pachón cavefish display a massive transcriptional  
69 upregulation of central genes in the lipogenesis pathway in the liver after feeding (up to 100-fold),  
70 compared to surface fish. This was accompanied by an upregulation of a central regulator of  
71 lipogenesis, the transcription factor Peroxisome proliferator-activated receptor gamma (Ppar $\gamma$ ).  
72 Moreover, we found increased levels of Ppar $\gamma$  activators and mutations in a direct repressor of  
73 Ppar $\gamma$  in cavefish populations, supporting the notion that higher activity of lipogenesis through  
74 Ppar $\gamma$  transcriptional and functional upregulation underlies the increased adipogenesis observed in  
75 cavefish.

76

## 77 **RESULTS**

### 78 **Cavefish display increased body fat levels throughout the body**

79 Previous studies have shown that compared to surface fish, cavefish populations display higher  
80 total triglycerides and visceral fat when fed ad libitum (Aspiras et al., 2015; Hüppop, 2001; Xiong  
81 et al., 2018). To confirm these findings and develop a method to more easily quantify total body  
82 fat in fish, we used EchoMRI to measure body fat percentage. Consistent with previous total  
83 triglycerides measurements (Aspiras et al., 2015), fish from both the Pachón and Tinaja  
84 populations showed higher body fat than surface fish (mean surface=15.2%; mean Pachón=39.6%;  
85 mean Tinaja=34.2%; Fig. 1A). To better visualize fat distribution throughout the body, we  
86 dissected adult fish into various sections and used hematoxylin and eosin (H&E) staining of head  
87 and trunk sections. We observed that Tinaja and Pachón cavefish store fat in the entire eye socket  
88 which is absent in surface fish (Fig. 1B). Tinaja and Pachón cavefish have markedly more  
89 adipocytes in the ventral part and lateral sides of the trunk compared to surface fish (Fig. 1C). In  
90 the dorsal part of the trunk, we observed only slightly more adipocytes in cavefish compared to  
91 surface fish (Fig. 1C). In total, the relative adipose area in the transverse trunk section of cavefish  
92 was significantly higher than that of surface fish (Fig. 1D). Additionally, we used the Folch  
93 method, which takes advantage of the biphasic solvent system consisting of  
94 chloroform/methanol/water (Folch et al., 1957) to extract and quantify total lipid content from  
95 head, dorsal and ventral parts of the trunk (Fig. 1E). We found Tinaja and Pachón cavefish have  
96 higher lipid content in the head, dorsal trunk and ventral trunk sections compared to surface fish

97 (Fig. 1F-H). Notably, we found no difference in hepatic triglyceride and total liver lipid between  
 98 adult surface fish and cavefish populations (Supplementary Fig. 1), indicating that one-year old  
 99 cavefish do not over accumulate lipid in the liver, at least on our lab feeding regime (see methods  
 100 for detail).  
 101

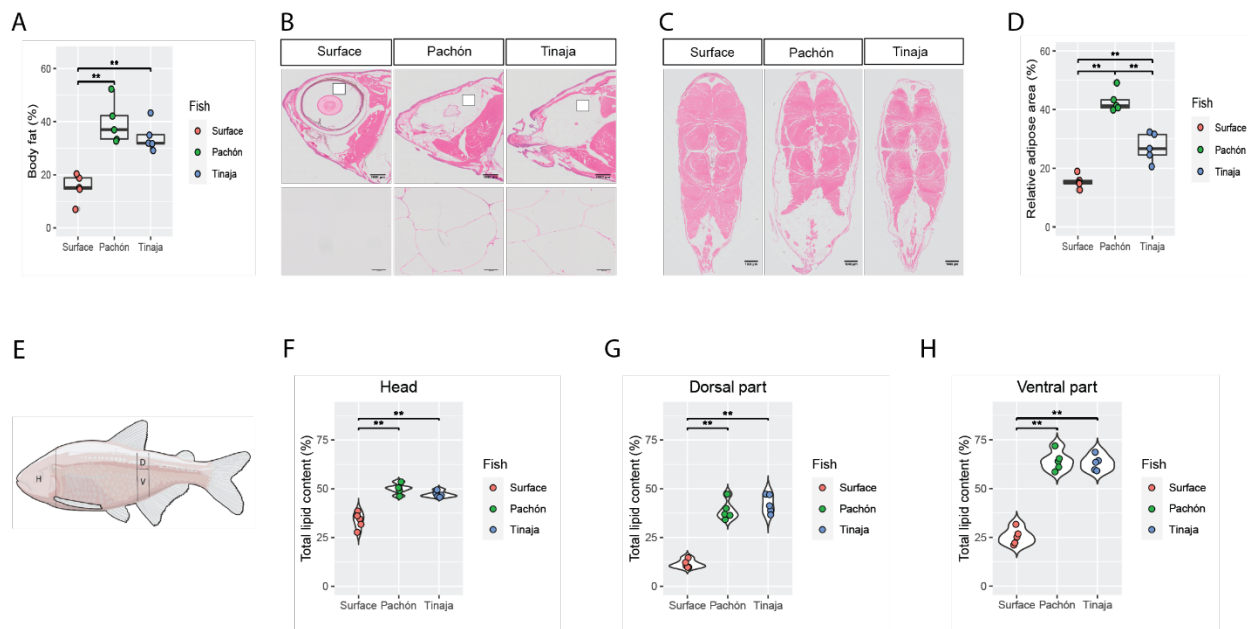

102  
 103  
 104 **Fig 1. Cavefish display more body fat in various areas of the body compared to surface fish.**  
 105 A) Total body fat comparison (fat mass/total body weight) between surface fish, and Pachón and  
 106 Tinaja cavefish using EchoMRI (n=5 per population). B) H&E staining of fish head sections of  
 107 the three fish populations (Surface, Pachón, Tinaja). The sagittal sections were performed across  
 108 the eye area of the head, the upper panel showing the entire section and the lower panel showing  
 109 the region indicated with a white box in the upper panel, revealing that in cavefish the eye socket  
 110 is filled with adipocytes (n=5 per population, scale bar=1 mm in the upper panel, scale bar=100  
 111  $\mu$ m in the bottom panel). C) Transverse H&E staining of fish trunk sections close to the anal fin  
 112 of the three fish populations (n =5 per population, scale bar =1 mm). D) Quantification of fat area  
 113 to the whole transverse trunk section area in surface fish, Pachón, and Tinaja cavefish using  
 114 “Convert to Mask” in ImageJ (n=5 per population). E) Cartoon highlighting sampling areas for  
 115 total lipid content quantification (H = head, D = dorsal part, V = ventral part, black lines indicate  
 116 the boundaries of sampling). F-H) Total lipid content (%) in surface fish, Pachón, and Tinaja  
 117 cavefish (n=5 per population) using the Folch method. Significances calculated with Wilcoxon  
 118 test, \*\*p <0.01.  
 119

## 120 **Cavefish increase lipogenesis in the liver**

121 Given the differences in body fat content between cavefish and surface fish populations throughout  
 122 different body parts, we hypothesized that cavefish display higher postprandial lipid anabolism

123 than surface fish. This should be particularly pronounced in Pachón cavefish as they are known to  
124 have similar appetites as surface fish (Alie et al., 2018; Aspiras et al., 2015). To study the  
125 transcriptional response to feeding, we first fasted juvenile Pachón cavefish and surface fish for 4  
126 days to allow transcription of anabolic genes to cease. We then refed the different populations the  
127 same amount of food and performed bulk RNA-seq of liver tissue, which is a primary center of  
128 lipogenesis (Fig. 2A). We identified ~16,000 genes (TPM > 1), of which ~2,300 were differentially  
129 expressed (DE) between the refed Pachón and surface fish samples (Supplementary Fig. 2). We  
130 performed GO-term enrichment analysis of the DE genes and identified numerous overrepresented  
131 metabolic pathways in the cavefish samples (Fig. 2B). Among these enriched terms in the cavefish  
132 samples, we identified lipid anabolic pathways such as fatty acid biosynthesis and triglyceride  
133 biosynthesis (Fig. 2B). To further dissect these pathways, we focused our analyses on key genes  
134 of these pathways (i.e., *acly*, *acaca*, *fasn*, *scd*, *elovl6*, *gpam*, *dgat1b*, *dgat2*, *lpin1*, *acsl4a*, *oxsm*,  
135 *olah*) (Fig. 2C). Interestingly, these genes showed similar expression level at the fasted state  
136 between surface fish and Pachón cavefish, but much higher expression levels in refed Pachón  
137 cavefish compared to refed surface fish (Fig. 2C). These results indicate a likely enhanced  
138 postprandial lipogenic capacity within the Pachón cavefish. We confirmed these results by  
139 focusing on three key fatty acid biosynthesis genes (ATP citrate lyase (*acly*), acetyl-CoA  
140 carboxylase 1 (*acaca*), and fatty acid synthase (*fasn*)) using qRT-PCR. All three genes responded  
141 to feeding by a 10-100 fold increased expression in Pachón cavefish compared to surface fish (Fig.  
142 2D), suggesting that Pachón cavefish have a greater ability to synthesize fatty acids following  
143 feeding than surface fish.

144

145 To better understand the temporal dynamics of postprandial gene expression – specifically the  
146 duration of increased lipogenesis - we performed a time course study of lipogenic gene expression.  
147 We measured transcription levels of key fatty acid biosynthesis genes (*acly*, *acaca*, *fasn*) and  
148 triglyceride biosynthesis genes (*scd1*, *elovl6*, *gpam*, and *dgat2*) using qRT-PCR of liver tissues of  
149 surface fish and Pachón cavefish at different time points after paired feeding. We found higher  
150 expression of these lipogenesis genes in Pachón cavefish samples compared to surface fish up to  
151 24 hours after feeding, with the highest expression at the 6-hour time point (Supplementary Fig.  
152 3). The gene expression differences were no longer detected at the 5-day time point. This indicates

153 that upregulation of lipogenesis can last more than 24 hours (but less than 5 days) after feeding the  
154 same amount of food in Pachón cavefish compared to surface fish.

155

156 To independently confirm whether increased lipogenesis in cavefish was occurring, we measured  
157 the conversion of saturated fatty acids to monounsaturated fatty acids, a key step in the generation  
158 of triglycerides from fatty acids (Ntambi and Miyazaki, 2004; Wang et al., 2015). The products of  
159 such conversion are monounsaturated fatty acids (MUFAs), chiefly oleate (18:1) and palmitoleate  
160 (c16:1) (Enoch et al., 1976; Ntambi et al., 2002). Because this reaction is catalyzed by the *scd* gene  
161 product Stearoyl-CoA desaturase, the expression level of *scd* gene and MUFA content reflect  
162 levels of active lipogenesis. We found mRNA expression of *scd* to be enhanced in Pachón cavefish  
163 liver samples compared to surface fish after feeding (Fig. 2E). Using available lipidomics data  
164 (Medley et al., 2020), we compared the abundance of MUFAs in cavefish. We found that both  
165 oleic acid and palmitoleic acid were present in higher levels in refed Pachón cavefish livers  
166 compared to surface fish samples and cavefish samples starved for 30 days (Fig. 2F). A further  
167 indicator of lipogenesis is the fatty acid desaturation index, the ratio of product (16:1n-7 and 18:1n-  
168 9) to precursor (16:0 and 18:0) fatty acids (Chong et al., 2008; Harding et al., 2015; Klawitter et  
169 al., 2014). Indeed, we found that refed Pachón cavefish have a higher desaturation index for  
170 palmitoleic acid and oleic acid than surface fish (Fig. 2G). Taken together, this data strongly  
171 suggests that Pachón cavefish have enhanced lipogenesis in the liver.

172

173

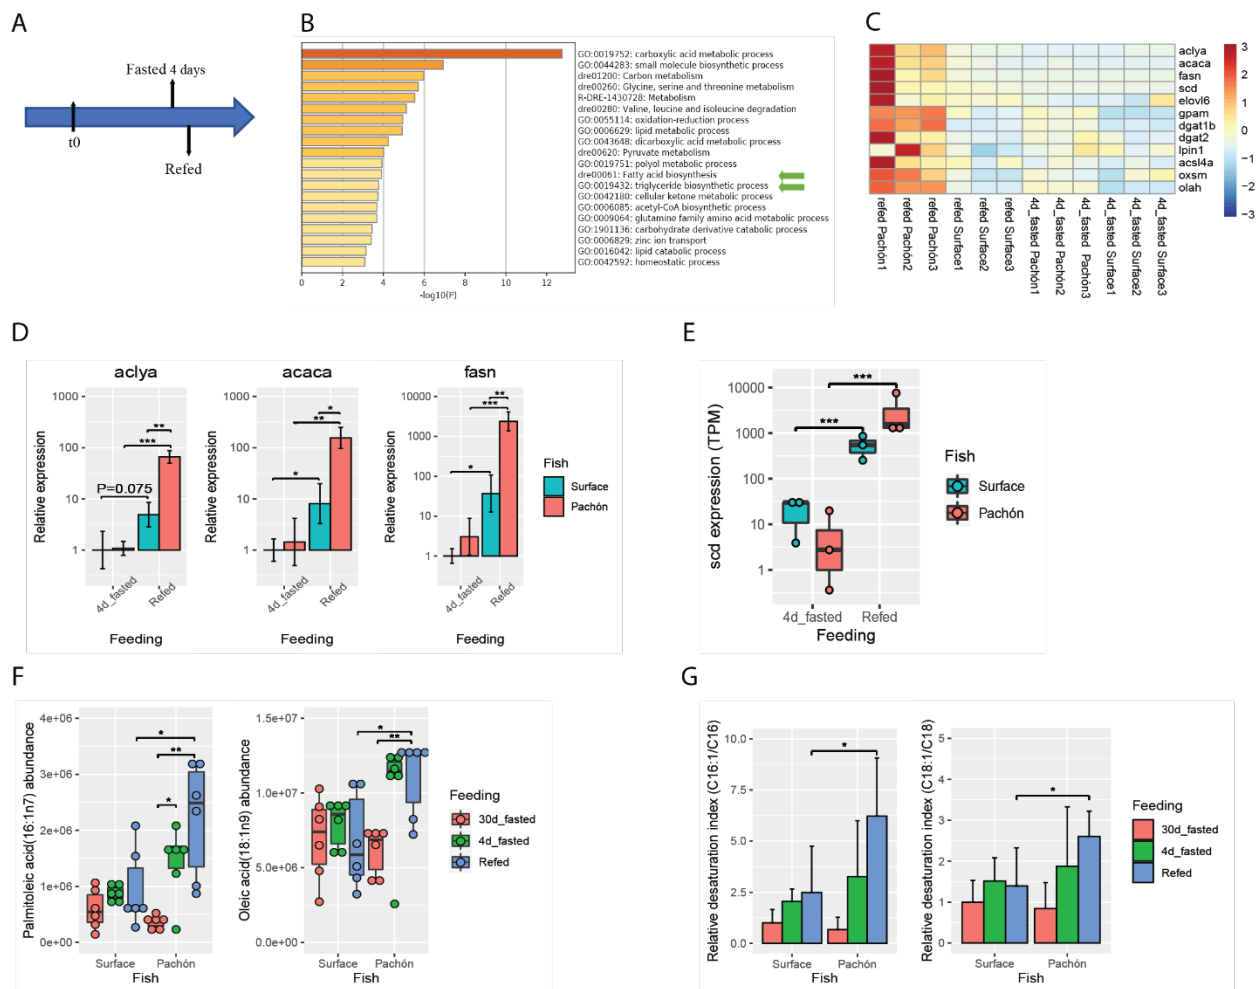

174

175 **Figure 2. Lipogenesis genes are upregulated in the liver and fatty acid profile is altered in**  
176 **Pachón cavefish compared to surface fish.**

177 A) Experimental design schematic for RNA-seq analysis of Pachón and surface fish (n=3 per  
178 population and condition). B) GO-term comparison and analysis of upregulated genes in refed  
179 Pachón and surface fish livers. Green arrows indicate the key lipid anabolic pathways, fatty acid  
180 biosynthesis and triglyceride biosynthesis process. C) Heatmap of lipogenesis genes in fasted and  
181 refed surface fish and Pachón cavefish. D) Relative expression (RT-qPCR) of fatty acid  
182 biosynthesis genes in livers of fasted and refed surface fish and Pachón cavefish (n=3, t-test). E)  
183 Expression of *scd* in livers of fasted and refed surface fish and Pachón cavefish (n=3) TPM:  
184 transcript per million. F) Fatty acid profiles of two monounsaturated fatty acids (n=6 wilcox test)  
185 data from (Medley et al., 2020). G) Refed Pachón cavefish livers have a higher desaturation index  
186 (C16:1n7/C16, and C18:1n9/C18) than surface fish (n=6, wilcox test) data from (Medley et al.,  
187 2020) \*p<0.05; \*\*p<0.01; \*\*\*p<0.001.

188

189

190

## 191 **Ppar $\gamma$ is upregulated in cavefish**

192 We checked the expression of transcription factors known to regulate lipogenesis to identify  
193 whether these may be involved in the upregulation of lipogenesis gene expression observed in  
194 cavefish. We found no significant difference in expression of the genes coding for the transcription  
195 factors Srebp1, Chrebp, Lxr, and Usf (Usf1 and Usf2) between the surface and Pachón samples  
196 (Supplementary Fig. 4). However, we noticed the gene *ppar $\gamma$* , encoding a transcription factor  
197 known to be a key regulator of adipogenesis and lipogenesis (Ahmadian et al., 2013; Lee et al.,  
198 2012; Schadinger et al., 2005; Sharma and Staels, 2007; Tontonoz and Spiegelman, 2008), to be  
199 significantly upregulated in Pachón cavefish samples at both the fasted and the refed state (Fig.  
200 3A). To test whether the differences in gene expression translate to the protein level, we generated  
201 an antibody against Ppar $\gamma$ . To test its specificity, we cotransfected either surface fish or cavefish  
202 *ppar $\gamma$*  along with GFP in HEK293T cell lines and immunostained the cells. Ppar $\gamma$  localized only  
203 in the nuclei of cells that were positive for GFP as the transfection control, suggesting specificity  
204 of the antibody. (Supplementary Fig. 5). We next used the antibody to quantify Ppar $\gamma$  protein levels  
205 in *Astyanax mexicanus*. We found higher levels of Ppar $\gamma$  in the liver of Pachón cavefish compared  
206 to surface fish (Supplementary Fig. 6A, B). To visualize cellular distribution of Ppar $\gamma$ , we  
207 performed immunofluorescence staining on liver sections. We found that Ppar $\gamma$  was mainly  
208 expressed in the nucleus and again found visibly higher levels in Pachón cavefish hepatocytes  
209 compared to surface fish liver cells (Fig. 3B, C). Together, these results show that Ppar $\gamma$  is  
210 upregulated at the mRNA and protein levels in the liver of Pachón cavefish compared to surface  
211 fish.

212  
213 To characterize whether increased protein levels translate into higher binding at the DNA level,  
214 we performed ChIP-Seq for Ppar $\gamma$  in two livers of surface fish and Pachón cavefish, respectively.  
215 Pearson correlations between all samples showed high correlation between the biological  
216 replicates (Supplementary Fig. 7A). We used Irreproducible Discovery Rate (IDR) to keep peaks  
217 that occurred consistently in both replicates and identified 5,371 high-confidence peaks (q  
218 value $\leq$ 0.01) located within 3kb of the predicted transcription start sites for the surface fish  
219 samples and 8,960 peaks for the Pachón cavefish samples (Fig. 3D, Supplementary Fig. 7B). 3,980  
220 of those peaks were shared between two fish populations (Fig. 3D). To test if these peaks contain  
221 an enrichment for predicted Ppar $\gamma$  binding sites, we searched all 10,251 peaks for the presence of



222 the mouse Ppar $\gamma$ ::Rxra motif using FIMO scan. We identified the predicted mouse Ppar $\gamma$ ::Rxra  
223 motif in 576 (5.56%) peaks, compared to a maximum of 268 (2.59%) motifs when randomly  
224 placing the same peaks in the TSS regions of all protein coding genes (repeated 1,000 times),  
225 suggesting an enrichment of potential Ppar $\gamma$  binding sites in our dataset (Fisher's exact test,  $p <$   
226  $1e-16$ ). In addition to more genomic binding in Pachón liver samples, we found these peaks to be  
227 higher with significantly more reads than in the surface fish samples (Fig. 3E). Notably, we  
228 identified genomic binding in known PPAR $\gamma$  target genes involved in lipogenesis (*e.g.*, *mgat1a*,  
229 *cd36*; Fig. 3F) (Feng et al., 2000; Lee et al., 2012; Zhou et al., 2008). These results are in line with  
230 our findings of higher levels of Ppar $\gamma$  in Pachón liver cells potentially driving expression of Ppar $\gamma$   
231 target genes to a higher extent than in surface fish liver cells, providing an important data set of  
232 Ppar $\gamma$  genome binding sites for future studies.

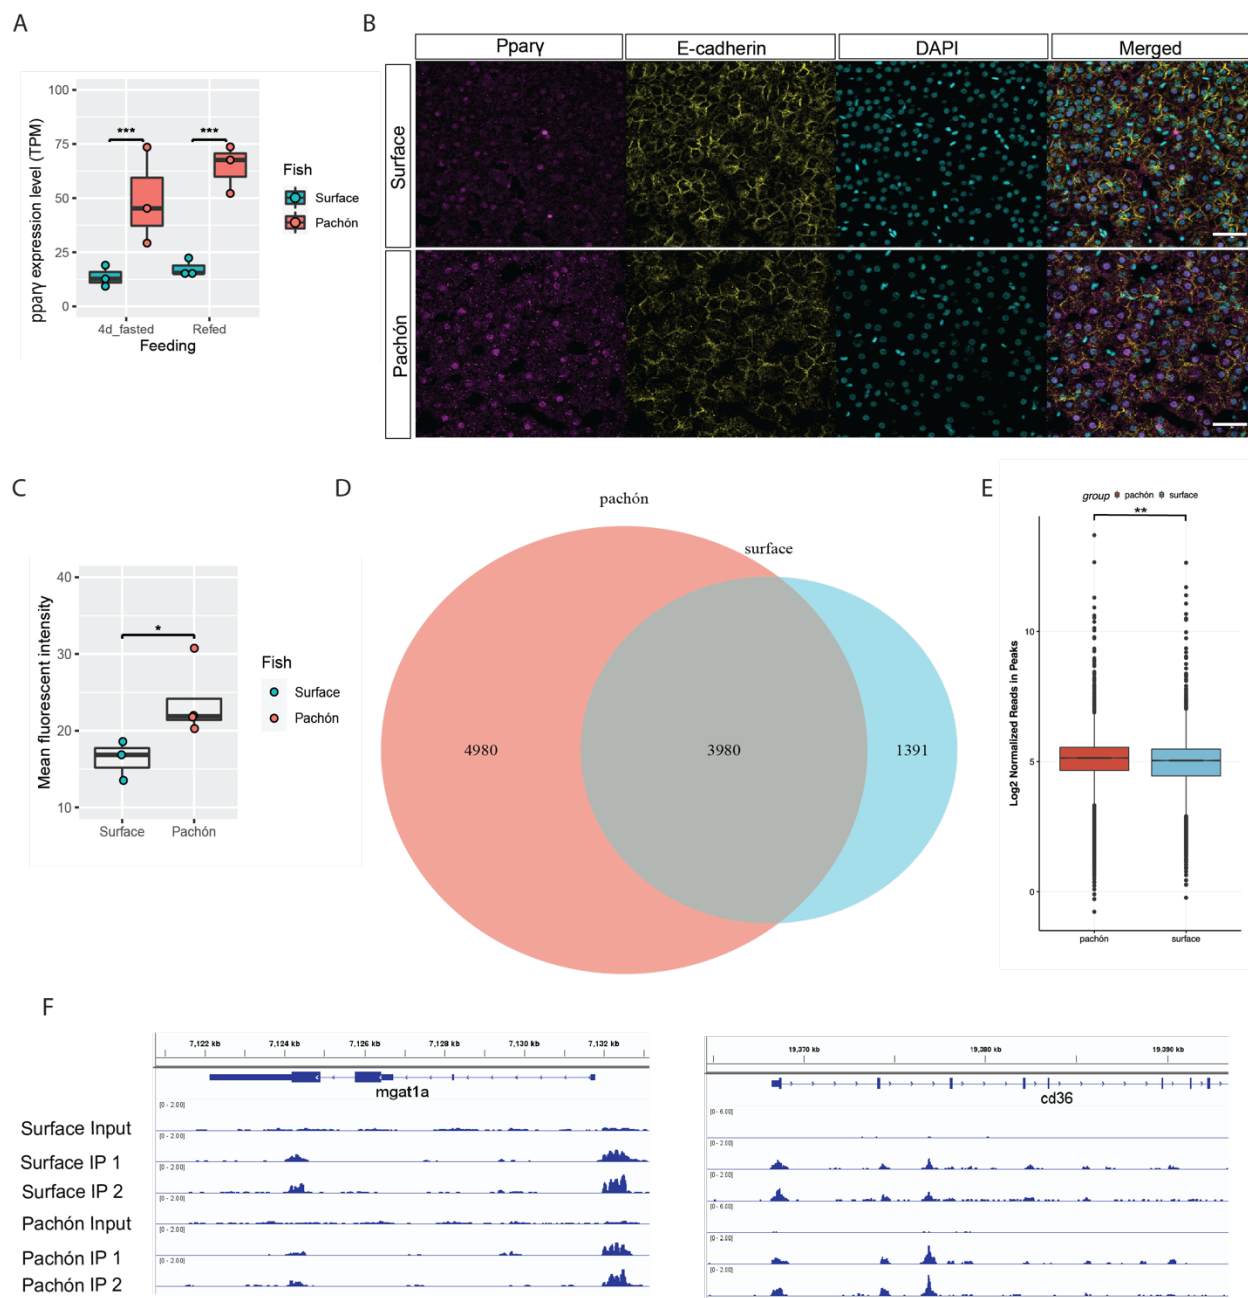

233

234 **Figure 3. *ppary* transcripts and Ppar $\gamma$  protein is upregulated in cavefish livers.**

235 A) *ppary* mRNA expression level comparison between surface fish and Pachón cavefish under two  
 236 feeding conditions: 4 day fasted and refed. TPM indicates transcript per million reads (n=3 for  
 237 each group, \*\*\*p<0.001). B) Immunostaining of Ppar $\gamma$  (magenta), E-cadherin (yellow), and DAPI  
 238 (turquoise) in liver sections of surface fish and Pachón cavefish. Scale bar =100  $\mu$ m. C)  
 239 Quantification of mean fluorescent intensity of Ppar $\gamma$  staining (n=3 for surface fish and Pachón  
 240 livers respectively). 187-317 hepatocytes were randomly selected from each fish liver sample for  
 241 intensity measurement (wilcox test, \*p<0.05) D) Venn diagram of Ppar $\gamma$  ChIP-seq peaks within  
 242 3kb of predicted transcription start sites in surface and Pachón cavefish livers. E) Ppar $\gamma$  ChIP-seq  
 243 peak height in log2 normalized read number (\*\* p<0.01). F) Examples of Ppar $\gamma$  ChIP-seq peaks  
 244 for known lipogenesis target genes (*mgat1a*, *cd36*).

245

## 246 **The regulation of Ppary**

247 PPAR $\gamma$  is a key regulator of lipid homeostasis and is activated by a variety of compounds, such as  
248 fatty acids, eicosanoids, and thiazolidinediones. These ligands act as PPAR $\gamma$  agonists that  
249 transcribe the genes involved in glucose and lipid homeostasis (Georgiadi and Kersten, 2012;  
250 Kliewer et al., 1997; Krey et al., 1997; Varga et al., 2011). In addition to Ppary, we investigated  
251 whether its activators (ligands) are also more abundant in the liver of Pachón cavefish compared  
252 to surface fish. Using published lipidomic profiling data (Medley et al., 2020), we found three  
253 natural activators (linolenic (C18:3), linoleic (C18:2), and arachidonic acids (C20:4)), to be more  
254 abundant in the livers of Pachón cavefish compared to surface fish livers (Fig. 4A). This is in line  
255 with the increased levels of the receptor, further indicating that higher lipogenesis in cavefish  
256 through Ppary may be occurring.

257

258 Interestingly, we identified a genomic mutation in a known suppressor of Ppary. Previously, it has  
259 been reported that Period circadian clock 2 (Per2) suppresses Ppary-mediated transcription by  
260 direct binding to its C-terminal domain (Grimaldi et al., 2010). Analyzing the RNA-Seq liver data,  
261 we found that in Pachón liver samples, the *per2* transcript is alternatively spliced leading to a  
262 skipping of Exon 21 (Fig. 4B). The final transcript contains a premature stop codon in Exon 22,  
263 which is predicted to lead to a truncation of 160 amino acids from Per2 C-terminus in close  
264 proximity to the predicted Ppary binding domain (Fig. 4B, Supplementary Fig. 8). We validated  
265 the splice variant using Sanger sequencing from cDNA generated from fresh liver tissue and found  
266 the alternatively spliced transcript to make up the majority, if not all, of the cDNA molecules (Fig.  
267 4C). We also found the same splice variant to be the predominant variant in liver samples of Tinaja  
268 cavefish, but not in Molino cavefish (Fig. 4C). When we sequenced the Molino *per2* transcript,  
269 we identified a different non-sense mutation further upstream of the Pachón and Tinaja variant.  
270 Molino cavefish carry a 7 bp deletion in Exon 13 of *per2*, leading to a premature stop codon in  
271 Exon 13 and a loss of 855 amino acids from Per2, including the entire predicted Ppary binding  
272 domain (Fig. 4D, Supplementary Fig. 8). The presence of two different non-sense mutations in  
273 *per2* in three independently derived cavefish populations indicates selection on loss of function  
274 mutations of *per2* in cavefish and a putative role in cave adaptation.

275

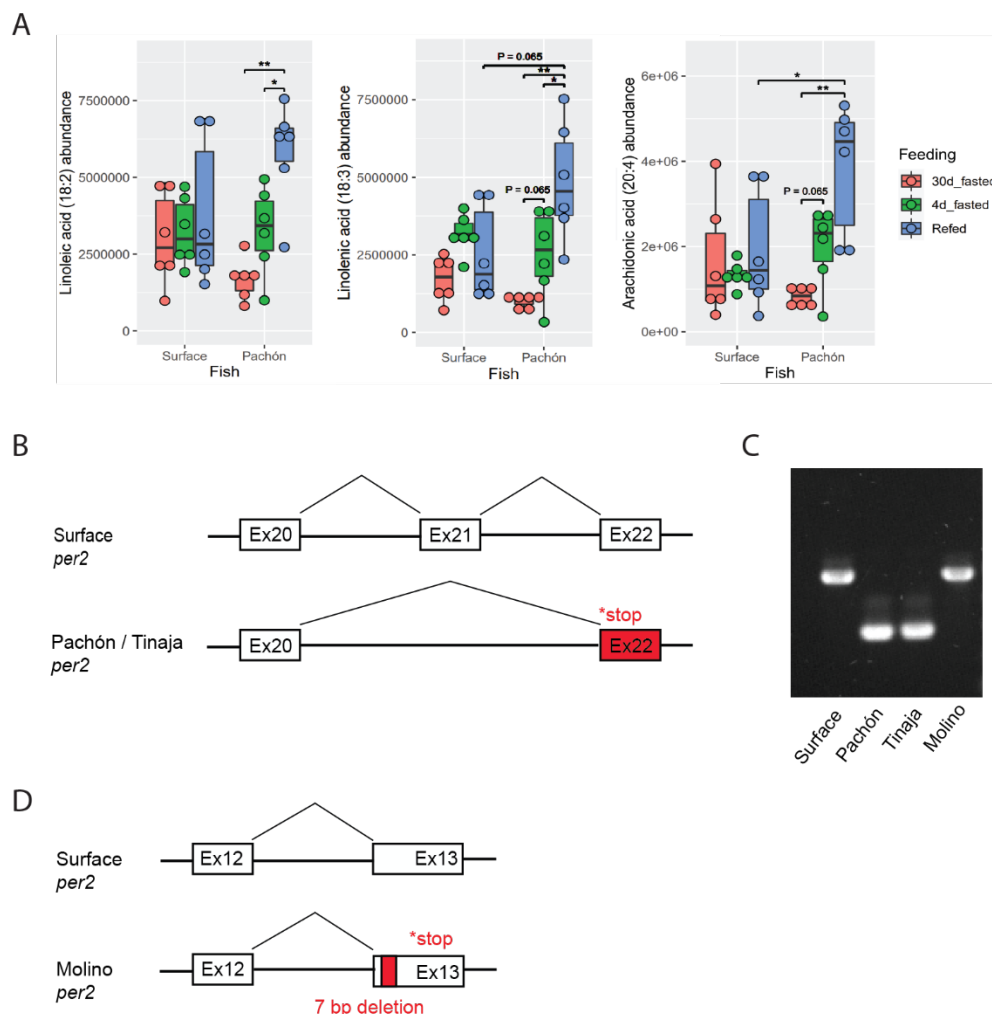

276

277 **Figure 4. Putative regulation of Ppar $\gamma$  in cavefish.**

278 A) Polyunsaturated fatty acids (PUFAs), including linoleic, linolenic, and arachidonic acids, are  
 279 more abundant in the liver of refed cavefish compared to surface fish liver samples (n=6 per  
 280 sample, units are mTIC-normalized peak heights). Significance was calculated with Wilcoxon test  
 281 \*p<0.05; \*\*p <0.01. B) Schematic depiction of the splice variant in Pachón *per2* leading to a  
 282 skipping of Exon 21 and a premature stop codon in Exon 22. C) PCR with primers located in Exon  
 283 20 and Exon 22 on cDNA from liver samples, highlighting the predominance of the splice variant  
 284 in Tinaja and Pachón. D) Schematic depiction of the location of the 7bp deletion in Molino *per2*  
 285 Exon 13 leading to a premature stop codon in Exon 13.

286

287 **Discussion**

288 We sought to interrogate the cellular mechanisms contributing to high body fat accumulation in  
 289 cavefish. First, we confirmed previous results showing that cavefish populations can store more  
 290 fat than surface fish (Aspiras et al., 2015; Xiong et al., 2018). Our study extends previous analyses

291 by showing that cavefish store body fat in a variety of tissues and locations in the body with certain  
292 areas more prone to body fat than others. For example, our study did not find cavefish to develop  
293 a fatty liver, which is in contrast to previous findings (Aspiras et al., 2015). This can either be due  
294 to differences in the diet of the fish used for our study, or the age of the fish used. We analyzed  
295 relatively young adult fish (~ 1 year), while previous studies have used older fish. Studying this  
296 further could provide important insights into how cavefish can deal with the accumulation of liver  
297 fat, which in humans causes nonalcoholic fatty liver disease (Rinella, 2015; Vernon et al., 2011).  
298 Furthermore, we developed a fast, reliable and cheap method of quantifying total body fat in  
299 cavefish using EchoMRI, which will open the door for high-throughput genetic analysis (i.e., QTL  
300 analysis) of fat accumulation in future studies.

301  
302 Using transcriptomic analysis, we uncovered a substantial upregulation of lipogenesis enzyme  
303 genes in the liver of Pachón cavefish compared to surface fish. Moreover, the lipidomic profiling  
304 demonstrated enhanced lipogenesis level in the Pachón cavefish. In comparison to surface fish,  
305 both of these lines of evidence argue for an increased ability of cavefish to synthesize triglycerides  
306 either through *de novo* lipogenesis or breakdown of dietary fat. The food consumed by fish in our  
307 lab is protein rich (~60%), arguing for a high turnover through *de novo* lipogenesis, which is in  
308 line with the observed upregulation of genes involved in fatty acid synthesis (*acly*, *acaca*, and  
309 *fasn*). However, the food also contains appreciable levels of fat (~15%), which makes it likely that  
310 some of the triglyceride biosynthesis occurs through absorption and esterification of fatty acids  
311 from the dietary fat. Follow up experiments with different diets, especially high carbohydrate diets,  
312 are needed to fully disentangle this.

313  
314 We also found *Ppar $\gamma$*  to be significantly upregulated in the liver of Pachón cavefish compared to  
315 surface fish. Upon ligand activation, *Ppar $\gamma$*  induces many target genes involved in lipogenesis and  
316 adipogenesis (Ahmadian et al., 2013; Lee et al., 2012; Schadinger et al., 2005; Sharma and Staels,  
317 2007; Tontonoz and Spiegelman, 2008), making it a likely candidate transcription factor to explain  
318 the upregulation of some of the lipogenesis genes in cavefish. While *Ppar $\gamma$*  has been shown to be  
319 upregulated in obese rodent models and human patients (Lee et al., 2012; Pettinelli and Videla,  
320 2011; Wolf Greenstein et al., 2017; Yu et al., 2003), a role of *Ppar $\gamma$*  in a species naturally adapted  
321 to food scarcity has, to our knowledge, not been reported before. Notably, we found the

322 upregulation of *ppary* to be present already in juvenile fish (before sexual maturation) and in  
323 specific response to the feeding event, further suggesting that it has an adaptive rather than  
324 pathological role. As Ppary plays important roles in adipogenesis, it is likely that the role of Ppary  
325 goes beyond the increased expression of lipogenesis genes, but that Ppary is also involved in  
326 increased adipogenesis in cavefish, potentially buffering the effect of lipotoxic lipid species  
327 (Medina-Gomez et al., 2007). Notably, we found evidence for increased genomic binding of Ppary  
328 using ChIP-Seq analysis. However, there are some limitations to this analysis. While we have  
329 validated the specificity of the antibody in vitro, we cannot fully exclude that some of the peaks are  
330 due to unspecific binding. We did identify a highly significant enrichment for the mouse  
331 Ppary::Rxra motif in peaks near predicted transcription start sites, however we do not know if the  
332 same motif is used in fish. Further functional analysis will be needed to fully disentangle this,  
333 however, our analysis sets an important foundation for ChIP-Seq analysis of transcription factors  
334 in non-traditional research systems.

335  
336 Importantly, we identified additional signs of activation of Ppary. Not only did we find its natural  
337 activators to be more abundant in cavefish compared to surface fish livers, but we also identified  
338 genomic mutations in one of its known repressors. Previous work has shown that PER2 represses  
339 PPAR $\gamma$  directly and knock-down of *Per2* leads to an increased activation of adipogenesis genes in  
340 vitro (Grimaldi et al., 2010). These findings are in line with the observed phenotypes in the  
341 cavefish. While in Molino the *per2* mutation is predicted to delete the Ppary binding domain, in  
342 Pachón and Tinaja the nonsense mutation is located 36 amino acids downstream of the predicted  
343 Ppary binding domain, potentially leaving the binding domain intact (Supplementary Fig. 8).  
344 While future experiments will be needed to explore whether these mutations affect protein  
345 structure or binding affinity for Ppary, it is tempting to speculate that these mutations may attenuate  
346 the inhibitory effect of Per2 on Ppary-mediated transcription, which in combination with higher  
347 levels of activators would lead to higher transcriptional activity of Ppary.

348  
349 Our finding of *per2* nonsense mutations in cavefish populations is interesting in terms of previous  
350 observations on this gene and circadian rhythms in general in cavefish. In studies of circadian  
351 rhythm in *A. mexicanus*, it was found that the ability to entrain a circadian rhythm is not completely  
352 lost in cavefish, but that there are differences in magnitude and timing of the rhythm (Beale et al.,

353 2013; Mack et al., 2020). It has been speculated that this could be in part due to increased basal  
354 levels of *per2* (Beale et al., 2013; Froland Steindal et al., 2018) . Our results add to these findings,  
355 potentially suggesting that Per2 is not fully functional even though its transcript is upregulated. To  
356 what extent the splice variant is present in other tissues, such as the fin or embryos, requires further  
357 investigation. However, it is clear that changes to circadian rhythm proteins are a hallmark of  
358 cavefish evolution. Interestingly, in the Somalian cavefish, *Phreatichthys andruzzi*, *per2* is found  
359 to have a nonsense mutation similar to the mutations we found in *A. mexicanus* (Ceinos et al.,  
360 2018) (Supplementary Fig. 8). A similar mutation in the same gene in a distantly related,  
361 convergent case of cave adaptation is an important sign of a role for this gene in adaptation. In this  
362 respect it may be worth noting that icefish have also lost *per2* (Kim et al., 2019). This is further  
363 emphasized by the fact that we found mutations in *per2* in three independently derived cavefish  
364 populations, making *per2* a major target of evolution and highlighting important connections  
365 between circadian rhythm and metabolism (Moran et al., 2014).

366

367

#### 368 **Data deposition**

369 Original data underlying this manuscript can be accessed from the Stowers Original Data  
370 Repository at <https://www.stowers.org/research/publications/libpb-1619>.

371

#### 372 **Materials and Methods:**

373

##### 374 *Fish husbandry*

375 Surface, Tinaja, and Pachón morphs of *Astyanax mexicanus* were reared at the Stowers Institute  
376 and all animal procedures were performed with IACUC approval. The aquatic animal program  
377 meets all federal regulations and has been fully accredited by AAALAC International since 2005.  
378 *Astyanax* were housed in polycarbonate tanks (~2 fish per liter), with a 14:10 hour light:dark  
379 photoperiod. Each rack uses an independent recirculating aquaculture system with mechanical and  
380 biological filtration, and UV disinfection. Water quality parameters are maintained within safe  
381 limits (upper limit of total ammonia nitrogen range, 0.5 mg/L; upper limit of nitrite range, 0.5  
382 mg/L; upper limit of nitrate range, 60 mg/L; temperature, 23 °C; pH, 7.65; specific conductance,  
383 800 µS/cm; dissolved oxygen, >90% saturation). Standard water change rates range from 20% -

384 30% daily (supplemented with Instant Ocean Sea Salt [Blacksburg, VA]). A diet of *Artemia* nauplii  
385 (Brine Shrimp Direct, Ogden, Utah), Mysis shrimp (Hikari Sales USA, Inc., Hayward, CA),  
386 Gemma Micro, and Gemma Diamond 0.8 (Skretting USA, Tooele, UT) was fed to  
387 fry/juvenile/adult fish 4 -12 months of age three times daily at a designated amount and directly  
388 proportional to the density of fish within the tank. The nutritional composition of Gemma Micro,  
389 according to the manufacturer, is Protein 59%; Lipids 14%; Fiber 0.2%; Ash 13%; Phosphorus  
390 2.0%; Calcium 1.5%; Sodium 0.7%; Vitamin A 23000 IU/kg; Vitamin D3 2800 IU/kg; Vitamin C  
391 1000 mg/kg; Vitamin E 400 mg/kg. The nutritional composition of Gemma Diamond 0.8,  
392 according to the manufacturer, is Protein 57%; Lipids 15%; Fiber 0.2%; Ash 10.5%; Phosphorus  
393 1.6%; Calcium 2.0%; Sodium 0.5%; Vitamin A 15000 IU/kg; Vitamin D3 2400 IU/kg; Vitamin C  
394 1000 mg/kg; Vitamin E 250 mg/kg.

395 Routine tankside health examinations of all fish were conducted by dedicated aquatics staff twice  
396 daily. *Astyanax* colonies are screened biannually for *Edwardsiella ictaluri*, *Mycobacterium* spp.,  
397 *Myxidium streisingeri*, *Pseudocapillaria tomentosa*, *Pseudoloma neurophilia*, ectoparasites, and  
398 endoparasites using an indirect sentinel program.

399

#### 400 *Body fat measurement*

401 The EchoMRI™ analyzer was used to quantify fish body composition. Replicates were measured  
402 and averaged as the readout for each sample. Fat mass normalized to total body weight was  
403 indicated as body fat content. We used ~1 year old female fish of similar sizes for this and the  
404 other lipid quantification experiments.

405

#### 406 *Total lipid content quantification*

407 The Folch method (Flynn et al. 2009) was used to measure total lipid content. In brief, we  
408 determined dry weight by drying tissue at 60°C for 48 hours in 5 mL Eppendorf tubes (pre-  
409 weighted: W0), then measured the total weight of dried tissue and tube: W1, and calculated tissue  
410 dry weight: W1-W0. The whole tissue/organ was then homogenized with homogenizer  
411 (Benchmark Scientific, D1036) into powder. 1 mL chloroform : methanol =2:1 (v/v) was added,  
412 then samples were washed with 200 µL 0.9% NaCl. Homogenates were vortexed and centrifuged  
413 at 2,000 x g for 30 min. The lower layer (containing liquid) was transferred to pre-weighted  
414 aluminum weigh dishes (VWR, 25433-016). The liquid was dried in the hood completely (over



415 12h). Then, the mass of the aluminum weigh dish containing lipids was determined using a Mettler  
416 Toledo (XS105 Dual range) balance. We calculated total lipid content of the tissue using following  
417 formula: Total lipid content = total lipids (mg) / tissue dry weight (mg) \* 100%.

418

#### 419 *Hepatic triglyceride measurement*

420 Fresh livers were collected, and mass determined. Then the hepatic triglyceride was quantified  
421 using the Triglyceride Assay Kit (ab65336) according to the manufacturer's instructions. The  
422 triglyceride level was calculated using the following formula:

423 Hepatic triglyceride measurement = triglyceride ( $\mu\text{g}$ ) / fresh liver weight (mg) \*100%.

424

#### 425 *H&E staining*

426 The fish head and trunk were dissected and fixed in 4% paraformaldehyde for 18 h at 4 °C and  
427 embedded in paraffin while following kit instructions for dehydration, infiltration and embedding.

428 Tissues were sectioned at 10  $\mu\text{m}$  and slides were dried for 1 h in a 60 °C oven. Then, slides were  
429 stained with hematoxylin for 3 min and eosin for 1 min. Slides were washed with desalted water  
430 and air dried. Images were obtained using a VS120 virtual slide microscope (Olympus) and  
431 analyzed with ImageJ. We used ~1 year old female fish of similar sizes for this experiment.

432

#### 433 *RNA-seq and transcriptome analysis*

434 We used 4 months old fish for this experiment because at this stage the livers are big enough to be  
435 dissected for RNA harvest and the fish are not sexually mature, which can affect lipid metabolism  
436 heavily. Fish were housed individually for the experiment. Each fish was fed 10 mg Gemma twice  
437 per day for at least one week to allow the fish acclimate to the new environment. Once the fish  
438 were used to the new feeding regime, they were all fasted after one feeding (10 mg Gemma per  
439 fish) for 4 days. These fish were termed as the fasted group. Half of the fish (3 surface and 3  
440 Pachón cavefish) were refed 10mg Gemma after 4 days fasting and were termed the refed group.  
441 Fish liver samples were dissected quickly, rinsed with cold PBS, and snap-frozen in liquid  
442 nitrogen. Total RNA was extracted using Trizol reagent (Ambion). Libraries were prepared  
443 according to manufacturer's instructions using the TruSeq Stranded mRNA Prep Kit (Illumina).  
444 The resulting libraries were purified using the Agencourt AMPure XP system (Beckman Coulter)  
445 then quantified using a Bioanalyzer (Agilent Technologies) and a Qubit fluorometer (Life

446 Technologies). Libraries were re-quantified, normalized, pooled and sequenced on an Illumina  
447 HiSeq 2500 using v4 High Output chemistry, single read 50bp, RTA v1.18.64, and bcl2fastq2  
448 v2.20 for demultiplexing and FASTQ file generation. Both surface fish and Pachón cavefish reads  
449 were aligned to surface fish genome (*Astyanax\_mexicanus*-2.0) via STAR aligner (v2.6.1c), under  
450 Ensembl 91 gene model. TPM gene expression values were generated using RSEM (v1.3.0).  
451 Pairwise differential expression analysis was performed using R package edgeR for different fish  
452 under different conditions. GO term enrichments were done based on upregulated and  
453 downregulated DE genes using Metascape (Zhou et al., 2019).

454

#### 455 *RT-qPCR*

456 The cDNA was made from 1 ug total RNA (from previous step) with high-capacity RNA-to-cDNA  
457 kit (applied biosystems, 4387406) and treated with DNase. (Promega, M6101) qPCR was  
458 conducted on a QuantStudio 6 Flex Real-Time PCR System with SYBR green detection.  
459 (Quantabio, 101414-288). Amplification specificity for each real-time PCR reaction was  
460 confirmed by analysis of the dissociation curves. Determined  $C_t$  values were then exploited for  
461 further analysis, with the *rpl13a* gene as the reference. Each sample measurement was made in  
462 triplicate. Primer sequences for *acaca* were *acaca\_F* 5'- CGCAGTGCCCATCTACGTG -3' and  
463 *acaca\_R* 5'- TGTTTGGGTCGCAGACAGC -3'. For *aclya*, the primer sequences were *aclya\_F*  
464 5'- GGGCACCACAGTTTTTCCAA -3' and *aclya\_R* 5'- CTGTCCGTGTGCCTGACTGA -3'.  
465 For *fasn*, the primer sequences were *fasn\_F* 5'- GGGCACCACAGTTTTTCCAA -3' and *fasn\_R*  
466 5'- CTGTCCGTGTGCCTGACTGA -3'. For *rpl13a*, primers were *rpl13a\_F* 5'-  
467 GTTGGCATCAACGGATTTGG -3' and *rpl13a\_R* 5'- CCAGGTCAATGAAGGGGTCA -3'.

468

#### 469 *Fatty acid profiling*

470 The fatty acid profiling data were extracted from (Medley et al., 2020). In brief: A group of 6  
471 surface and 6 Pachón were starved for 30 days before dissected for liver collection (30d\_fasted).  
472 A second group of 6 surface and 6 Pachón were fed regularly until 4 days before dissection  
473 (4d\_fasted). A third group of 6 surface and 6 Pachón were fed regularly until 4 days before  
474 dissection. Then, on the day for dissection, they were refed 10 mg Gemma 500. Then 3 hours after  
475 they were refed, livers were collected (refed). All the livers were snap frozen and shipped to West  
476 Coast Metabolomics Center on dry ice. Fatty acids abundances were determined by charged-

477 surface hybrid column-electrospray ionization quadrupole time-of-flight tandem mass  
478 spectrometry (CSH-ESI QTOF MS/MS). Data was reported as peak height using the unique  
479 quantification ion at the specific retention index.

480

481

#### 482 *Antibody generation*

483 The protein sequence of Ppary was used to blast against Astyanax genomes (Astyana\_mexicanus-  
484 1.0.2 and Astyanax\_mexicanus-2.0) to evaluate similarity of Ppary to other proteins in the genome.  
485 We chose 227-564aa of Ppary as antigen for its relatively high specificity. This 338aa protein  
486 fragment was then expressed in E.coli and used to immunize two rabbits for antibody production  
487 by GenScript. ELISA titer > 1:128,000 and target protein fragment binding validation by western  
488 blot and cell line overexpression.

489

#### 490 *Western blot*

491 For western blot, we used four-months-old juvenile fish. The feeding regime was the same as those  
492 fish for RNA-seq. Fish liver samples were dissected quickly, rinsed with cold PBS, and snap-  
493 frozen in liquid nitrogen. Western blotting was performed using standard protocols. Briefly, liver  
494 tissues were lysed in RIPA buffer and total protein concentrations were determined by MicroBCA  
495 protein assay kit (Thermo Scientific, 23235) according to the manufacturer's instructions and  
496 infinite 200 PRO microplate reader (Tecan). For each sample, 10 ug total protein were loaded to  
497 each well to run SDS-PAGE gel, protein transfer from gel to pvdf membrane, blocking, and  
498 antibody incubation. Imaging was carried out with Odyssey CLx system (LI-COR). The band  
499 intensity was calculated with FIJI.

500

#### 501 *HEK293T Cell line overexpression*

502 The surface fish and Pachón cavefish *ppary* coding regions were cloned from cDNA, then they  
503 were inserted into pDestTol2 vector under the control of the hsp70 promoter (from zebrafish)  
504 respectively. 7.5uL FuGene (E2311) and 2.5ug plasmid were transfected into HEK293T cells on  
505 glass bottom microwell plates (MetTek, P35G-1.5-14-C). 24 hours later, 41 °C heat shock for 1  
506 hour was performed. 48 hours after transfection, cells were fixed with 4% pfa for 20 min at room  
507 temperature (RT). Cells were permeabilized with PBST (0.1% Triton X-100) for 30 minutes at

508 RT. Blocking was performed with Universal Blocking Reagent (BioGenex, HK085-5K,) for 1  
509 hour at RT. A series of anti-Ppar $\gamma$  antibody dilutions were used to incubate cells for 2 hours at RT.  
510 After PBST (0.1% Triton X-100) wash, cells were incubated with Alexa Fluor® 568 goat anti-  
511 rabbit (Invitrogen, A-11011) and DAPI (Sigma-Aldrich, D9542) for 1 hour at RT. After PBS wash,  
512 cells were imaged with Axiovert 200M microscope.

513

#### 514 *Immunofluorescence staining*

515 Liver tissues were fixed with 4% pfa for 16 hours at 4 °C. Then liver sections (10  $\mu$ m) were done  
516 through cryostat sectioning. Slides were treated with PBS to get rid of OTC and permeabilized  
517 with 0.1% PBST (Triton X-100) for 45 min. Blocking was performed at room temperature for 1  
518 hour. Samples were treated with TrueBlack® Lipofuscin Autofluorescence Quencher (Biotium,  
519 23007) before addition of primary antibody. Then, Primary antibody incubation was carried out at  
520 4 °C overnight. Secondary antibody and DAPI (Sigma-Aldrich, D9542) incubation were done at  
521 room temperature for 3 hours. The antibodies in this study include anti-PPAR $\gamma$  (see antibody  
522 generation), anti-E-Cadherin (BD, 610182 Transduction Laboratories), goat anti-rabbit  
523 (Invitrogen, A32733), and donkey anti-mouse (Invitrogen, A31570). Images were taken with Leica  
524 TCS SP8 X microscope and analyzed with scikit-image.

525

#### 526 *ChIP-seq*

527 Livers from eight juvenile fish (four-month-old) were pooled together and snap frozen. Then the  
528 frozen tissues were grinded into powder, followed by 1% pfa (diluted from 16% pfa, Thermo  
529 Fisher, PI28906) fixation for 10 min at room temperature. The cross link was quenched with 0.125  
530 M glycine. Chromatin shearing was performed by using a Bioruptor sonication system with  
531 following parameters: 30 s on and 30 s off per cycle, 10 cycles in total. DNA fragments were  
532 collected and purified with MAGnify™ Chromatin Immunoprecipitation System (ThermoFisher,  
533 492024) according the kit instruction. Purified DNA (~10 ng) for each sample was taken as input  
534 to construct the library. Libraries were prepared using the KAPA HTP Library Prep Kit (Roche,  
535 KK8234) with 15 cycles of PCR and using 1:125 dilution of NEXTflex DNA barcodes (Perkin  
536 Elmer,NOVA-514104). The resulting libraries were purified using the Agencourt AMPure XP  
537 system (Beckman Coulter) then quantified using a Bioanalyzer (Agilent Technologies) and a Qubit  
538 fluorometer (Life Technologies). Post amplification size selection was performed on all libraries

539 using a PippinHT (Sage Science). High throughput sequencing was performed on the Illumina  
540 NextSeq platform. Both surface fish and Pachón cavefish reads were aligned to surface fish  
541 genome (*Astyanax\_mexicanus*-2.0). Genome browser track files in bigWig format were generated  
542 using R (version 4.0.0) packages GenomicRanges (version 1.40) (Lawrence et al., 2013) and  
543 rtracklayer (version 1.48) (Lawrence et al., 2009). Signals were normalized to fragments/reads per  
544 million (RPM). Peaks were called using MACS2 (version 2.1.2) (Zhang et al., 2008) for individual  
545 and merged replicates, respectively (q-value cutoff of 0.01). Next, IDR  
546 (<https://github.com/nboley/idr>, version 2.0.4.2) was used to keep those peaks that occurred  
547 consistently in both replicates. We further filtered peaks using fold enrichment and q-value cutoffs  
548 at summit position (fold enrichment  $\geq 5$  and q-value  $\leq 1E-20$ ). We took the summit position of the  
549 filtered peaks and used R package ChIPseeker (version 1.24.0) (Yu et al., 2015) to annotate the  
550 peaks to genomic features, including promoters ( $\pm 3$  Kb from transcription start site, TSS), exons,  
551 introns, downstream (within 3 Kb downstream of transcription end site), and distal intergenic  
552 regions. *Astyanax* genome annotation was obtained from Ensembl 98 (Yates et al., 2020). We  
553 combined and merged filtered peaks for Pachón and surface using bedtools (version 2.29) (Quinlan  
554 and Hall, 2010). For each merged peak, the new summit was assigned as the median of all  
555 overlapping peaks. Then the merged peaks were resized to 401 bp by extending 200 bp upstream  
556 and downstream of the new summits. The resized peaks were treated as the meta-peak list. We  
557 used FIMO (version 5.3.0) (Grant et al., 2011) to scan the occurrences (p-value cutoff of  $1E-5$ ) of  
558 mouse *Pparg* motifs (MA0065.2 in JASPAR 2020 database (Fornes et al., 2020) in 10351 meta-  
559 peaks falling into promoter regions (defined as  $\pm 3$  Kb from transcription start site). To test motif  
560 enrichment, we randomly placed these meta-peaks in the promoter regions of all protein coding  
561 genes and performed FIMO scan using the same parameters. This shuffle process was repeated  
562 1000 times.

563

#### 564 *Per2* genotyping

565 Primers used to capture alternative splicing in Pachón and Tinaja (5'-3'):

566 Forward: CATCACTGTGACGCTCTCTCATCATCCAG

567 Reverse: CTCAACCAGGGATGAACCTCAGCC

568 PCR conditions: Denaturing 95 °C 30 sec - Annealing 57 °C 30 sec - Extension 72 °C 45 sec

569 35 cycles

570 Primers used for Molino genomic DNA confirmation of 7 bp duplication (5'-3'):

571 Forward: CTAGGCAGTAATGATCACCTGATGAG

572 Reverse: GACTTGCCTGGAGCCTTTCTGGTC

573 PCR conditions: Denaturing 95 °C 30 sec - Annealing 56 °C 30 sec - Extension 72 °C 60 sec  
574 35 cycles

575

## 576 Acknowledgements:

577 We thank Diana Baumann, Zachary Zakibe, Alba Aparicio Fernandez, Andrew Ingalls, David  
578 Jewell, Franchesca Hutton-Lau, Molly Miller and Elizabeth Fritz for cavefish husbandry and  
579 support. We appreciate the support from Dai Tsuchiya, Seth Malloy, and Karen J Smith of the  
580 Stowers histology support facility, the help from Rhonda Egidy, Amanda Lawlor, Michael  
581 Peterson, and Anoja Perera of the Stowers molecular biology support facility, the assistance from  
582 Alexis Murray, Olga Kenzior, and Chongbei Zhao of the Stowers tissue culture support facility,  
583 the training from Zulin Yu, Cindy Maddera, Sean McKinney, and Richard Alexander of the  
584 Stowers microscopy support facility. We thank the members of the Rohner lab for comments on  
585 the manuscript. This work was done to fulfill, in part, requirements for SX's PhD thesis research  
586 as a student registered with the Open University, U.K.

587

588

589

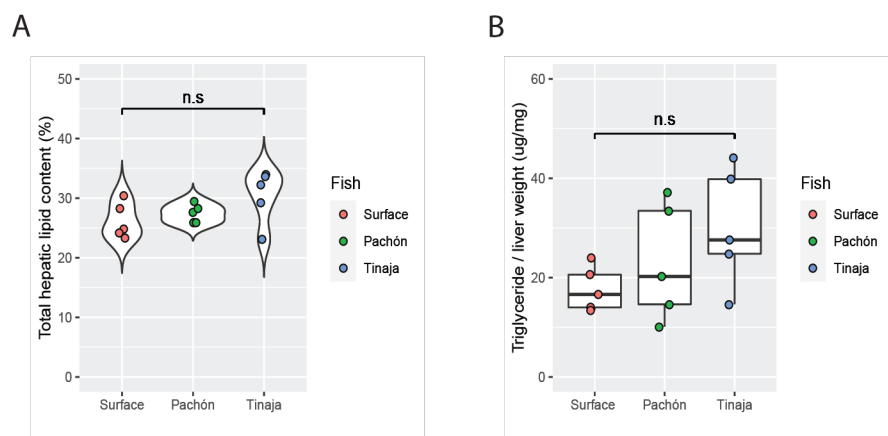

590

591

## 592 Supplementary Figure 1. Liver fat comparison between surface fish and cavefish

593 A) Total lipid content (total lipid normalized to dried tissue weight) in the liver of surface fish and  
594 cavefish populations. B) Hepatic triglyceride (hepatic triglyceride normalized to fresh liver

595 weight) comparison between surface fish and cavefish populations (n=5 per population). Wilcox  
596 test was used to determine p value and n.s indicates not significant ( $p>0.05$ ).  
597

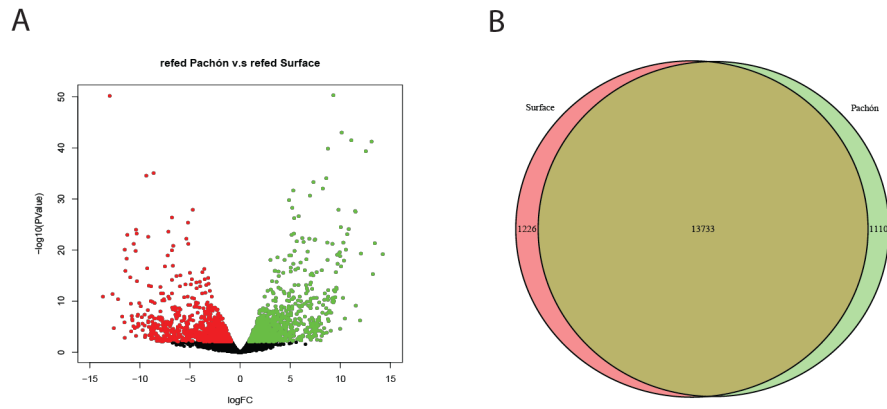

598

599

600 **Supplementary Figure 2. Transcriptome comparison between refeed surface and refeed**  
601 **Pachón cavefish liver samples.**

602 A) Volcano plot shows the transcriptome profile comparison between refeed surface and refeed  
603 Pachón cavefish. Each dot indicates one transcript. The red and green dots show the down-  
604 regulated and up-regulated transcripts in refeed Pachón compared to surface fish respectively. Black  
605 dots represent transcripts with similar expression level between the two fish populations. B) Venn  
606 diagram of the transcript number comparison between refeed surface and refeed Pachón cavefish.  
607 From left to right: down-regulated, unchanged, and up-regulated transcripts in refeed Pachón  
608 compared to surface fish respectively.

609

610

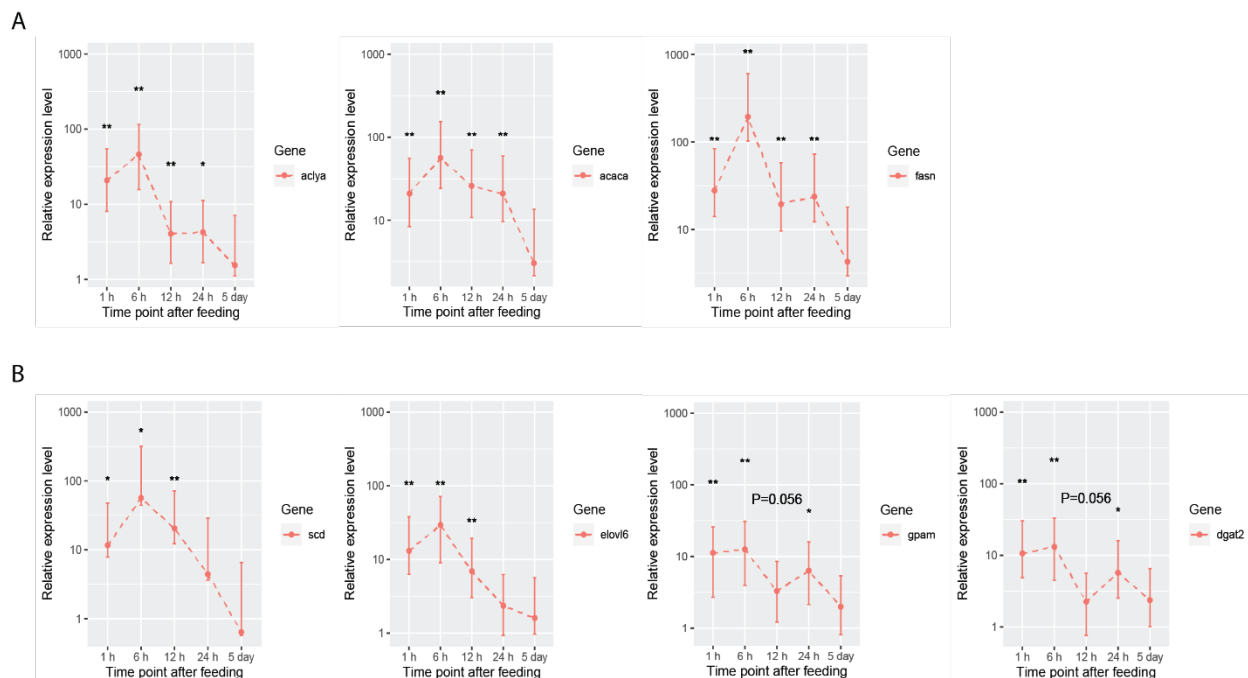

611

612

### 613 **Supplementary Figure 3. Lipogenesis gene expression dynamics after feeding**

614 A) Relative expression level (Pachón compared to surface) change of fatty acid biosynthesis genes  
 615 (*acly*, *acaca*, and *fasn*) at different time points (1 hour, 6 hours, 12 hours, 24 hours, and 5 days)  
 616 after feeding in the liver of surface fish and Pachón cavefish. B) Expression change of triglyceride  
 617 biosynthesis genes (*scd1*, *elovl6*, *gpam*, and *dgat2*) at different time points (1 hour, 6 hours, 12  
 618 hours, 24 hours, and 5 days) after feeding in the liver of surface fish and Pachón cavefish. Wilcox  
 619 test was used to determine p-value, (\*  $p < 0.05$ ; \*\*  $p < 0.01$ ).

620

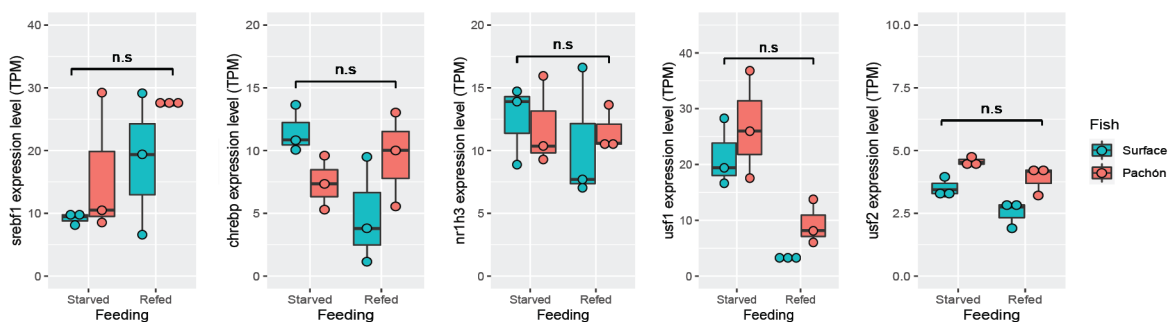

621

### 622 **Supplementary Figure 4. Lipogenesis transcription factor expression.**

623 RNA expression level of genes coding for known lipogenesis transcription factors in surface and  
 624 Pachón cavefish livers after starvation followed by refeeding. These transcription factors include  
 625 Srebfl1 (Sreb1), Chrebp, Nr1h3, Usf1, and Usf2. TPM means transcripts per million reads. Cyan  
 626 color indicates surface fish and red color represents Pachón cavefish. Fasted and refeed indicate the  
 627 feeding state of the fish sample (n=3 per sample).

628



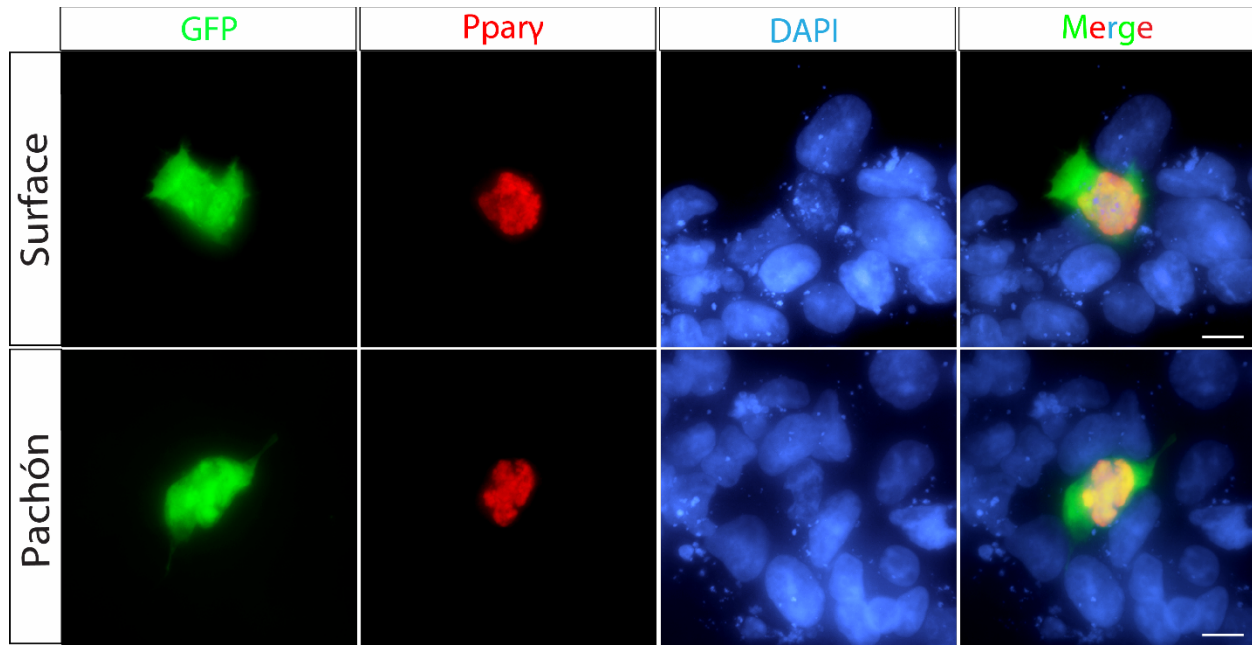

629

630

631 **Supplementary Figure 5. Anti-Ppary antibody detects surface and Pachón Ppary.**

632 Transient cotransfection of expression plasmids encoding for either surface fish Ppary (top panel)  
633 or cavefish Ppary (bottom panel) with GFP in HEK293T cell lines. GFP (green channel) is  
634 expressed in the cytoplasm. Ppary in surface fish or in Pachón cavefish (red channel) localizes in  
635 the nucleus. DNA was stained with DAPI (blue channel) . The merge channel shows the  
636 superposition of each channel. Scale bar =10  $\mu$ m.

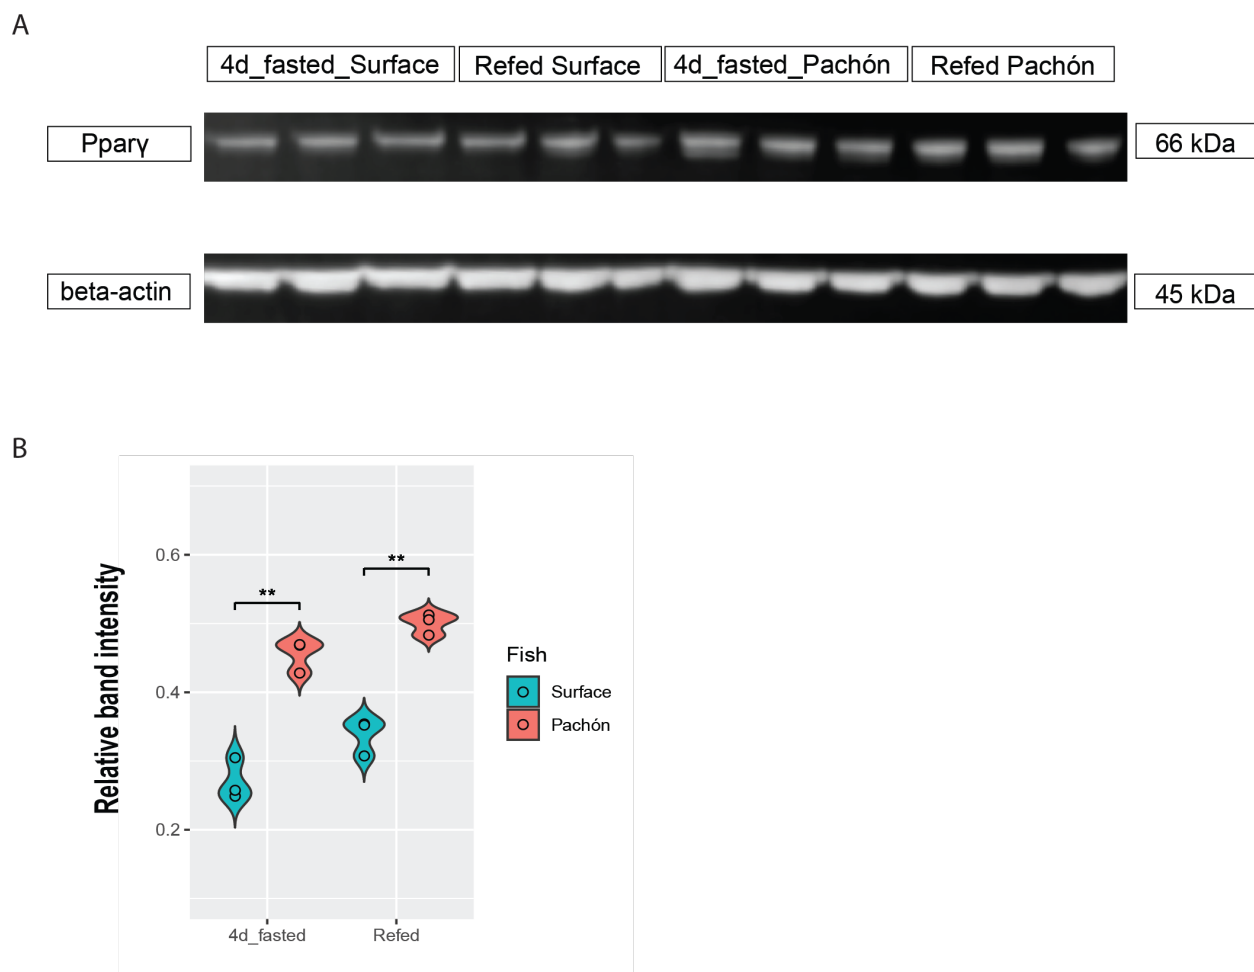

637

638 **Supplementary Figure 6. Ppary protein expression level quantification by western blot.**

639 A) Western blots of Ppary in the liver of surface fish and Pachón cavefish with beta-actin as  
640 loading control (n=3 for each group). B) Quantification of Western blot band intensity after  
641 normalizing to beta-actin control using ImageJ (n=3, wilcox test, \*\*p<0.01).

642

A

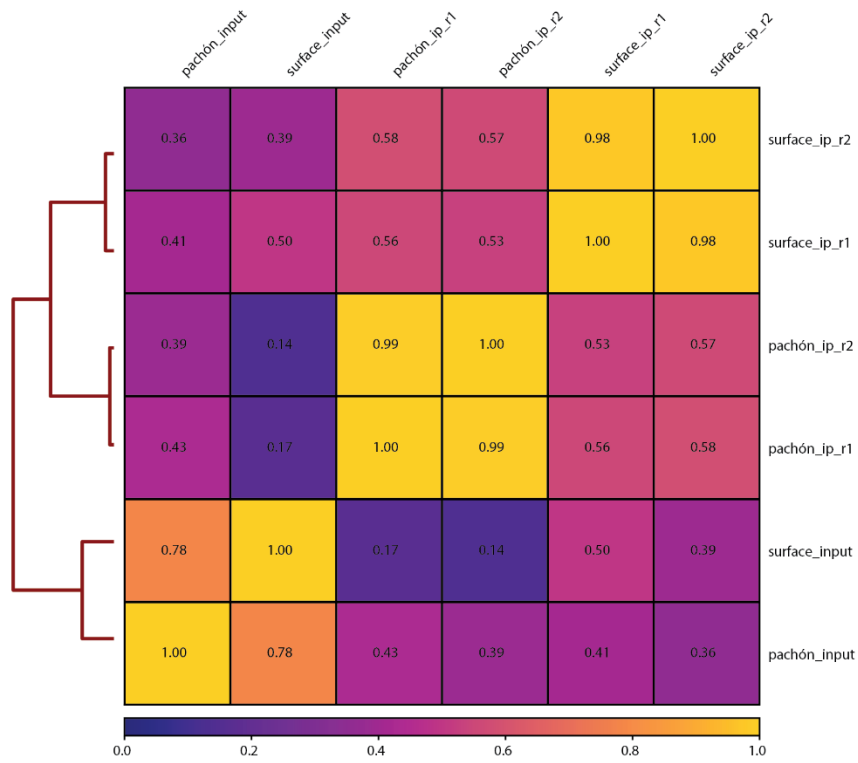

B

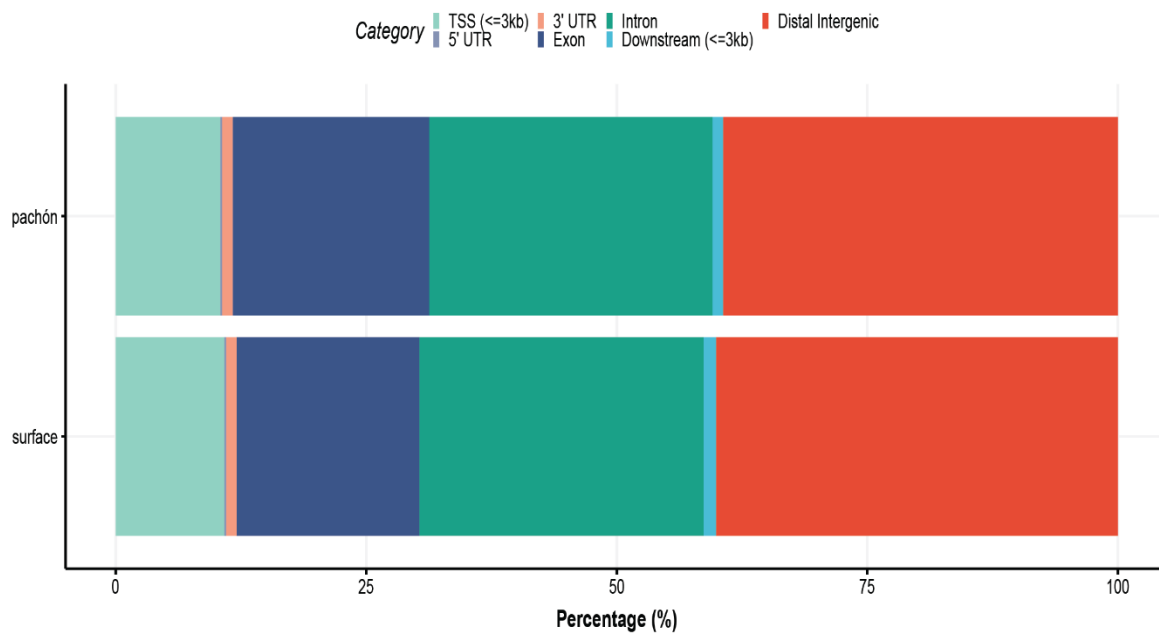

643  
644

645 **Supplementary Figure 7. Ppary ChIP-Seq sample correlation and genome distribution plot.**

646 A) Pearson Correlation Coefficient Sample Heatmap highlighting strong correlation between  
647 biological replicates. The correlation plot is based on the log<sub>2</sub> read counts of bins across the  
648 genome that are generated using the R package Genomic Alignments with fixed bin size  
649 (n=10000). B) Predicted genome distribution of the peaks identified in Ppary ChIP-Seq using the  
650 Ensembl annotation of the *Astyanax mexicanus* surface fish genome in Pachón (top) and surface  
651 fish (bottom) liver samples. For further analysis we focused on peaks near predicted TSS ( $\leq 3$ kb).  
652

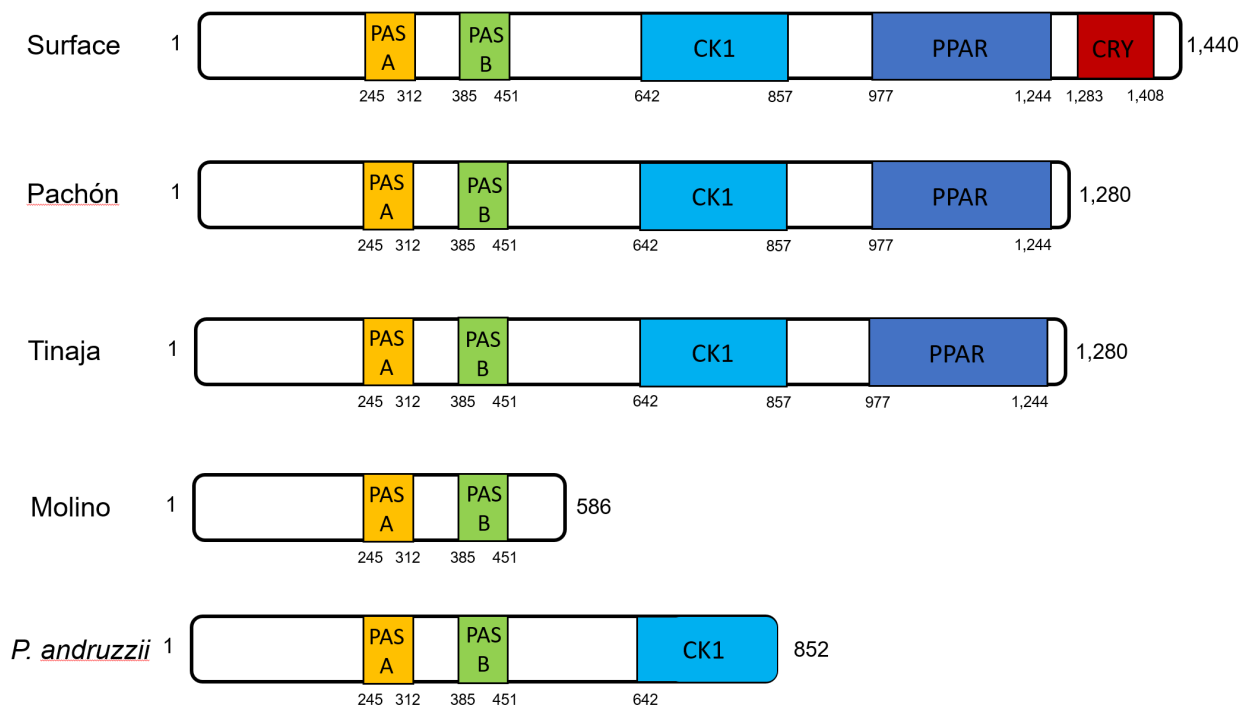

653  
654 **Supplementary Figure 8. Cavefish Per2 proteins lack predicted key domains from the**  
655 **ancestral surface fish version.**

656 Schematic of Per2 protein with locations of Per2 mutations in *Astyanax mexicanus* cavefish  
657 populations and *Phreatichthys andruzzii* (Somalian cavefish). PPAR: homology to predicted Ppary  
658 binding domain. CRY: homology to Cry1 interacting region. PAS: homology to Per-Arnt-Sim  
659 domain; CK1: homology to casein kinase binding domain. Numbers indicate the amino acid  
660 number from N-terminal (left) to C-terminal (right).  
661  
662  
663

664 References:

665

666 Ahmadian, M, Suh, JM, Hah, N, Liddle, C, Atkins, AR, Downes, M, Evans, RM (2013) PPARgamma  
667 signaling and metabolism: the good, the bad and the future. *Nat Med* 19, 557-566.

668 Alie, A, Devos, L, Torres-Paz, J, Prunier, L, Boulet, F, Blin, M, Elipot, Y, Retaux, S (2018)  
669 Developmental evolution of the forebrain in cavefish, from natural variations in neuropeptides  
670 to behavior. *eLife* 7.

671 Aspiras, AC, Rohner, N, Martineau, B, Borowsky, RL, Tabin, CJ (2015) Melanocortin 4 receptor  
672 mutations contribute to the adaptation of cavefish to nutrient-poor conditions. *Proc Natl Acad*  
673 *Sci U S A* 112, 9668-9673.

674 Beale, A, Guibal, C, Tamai, TK, Klotz, L, Cowen, S, Peyric, E, Reynoso, VH, Yamamoto, Y,  
675 Whitmore, D (2013) Circadian rhythms in Mexican blind cavefish *Astyanax mexicanus* in the lab  
676 and in the field. *Nat Commun* 4, 2769.

677 Ceinos, RM, Frigato, E, Pagano, C, Frohlich, N, Negrini, P, Cavallari, N, Vallone, D, Fuselli, S,  
678 Bertolucci, C, Foulkes, NS (2018) Mutations in blind cavefish target the light-regulated circadian  
679 clock gene, period 2. *Sci Rep* 8, 8754.

680 Chong, MF, Hodson, L, Bickerton, AS, Roberts, R, Neville, M, Karpe, F, Frayn, KN, Fielding, BA  
681 (2008) Parallel activation of de novo lipogenesis and stearoyl-CoA desaturase activity after 3 d  
682 of high-carbohydrate feeding. *Am J Clin Nutr* 87, 817-823.

683 Enoch, HG, Catala, A, Strittmatter, P (1976) Mechanism of rat liver microsomal stearyl-CoA  
684 desaturase. Studies of the substrate specificity, enzyme-substrate interactions, and the function  
685 of lipid. *J Biol Chem* 251, 5095-5103.

686 Feng, J, Han, J, Pearce, SF, Silverstein, RL, Gotto, AM, Jr., Hajjar, DP, Nicholson, AC (2000)  
687 Induction of CD36 expression by oxidized LDL and IL-4 by a common signaling pathway  
688 dependent on protein kinase C and PPAR-gamma. *J Lipid Res* 41, 688-696.

689 Folch, J, Lees, M, Sloane Stanley, GH (1957) A simple method for the isolation and purification  
690 of total lipides from animal tissues. *J Biol Chem* 226, 497-509.

691 Fornes, O, Castro-Mondragon, JA, Khan, A, van der Lee, R, Zhang, X, Richmond, PA, Modi, BP,  
692 Correard, S, Gheorghe, M, Baranasic, D, Santana-Garcia, W, Tan, G, Cheneby, J, Ballester, B,  
693 Parcy, F, Sandelin, A, Lenhard, B, Wasserman, WW, Mathelier, A (2020) JASPAR 2020: update of  
694 the open-access database of transcription factor binding profiles. *Nucleic Acids Res* 48, D87-  
695 D92.

696 Froland Steindal, IA, Beale, AD, Yamamoto, Y, Whitmore, D (2018) Development of the  
697 *Astyanax mexicanus* circadian clock and non-visual light responses. *Developmental biology* 441,  
698 345-354.

699 Georgiadi, A, Kersten, S (2012) Mechanisms of gene regulation by fatty acids. *Advances in*  
700 *nutrition* 3, 127-134.

701 Grant, CE, Bailey, TL, Noble, WS (2011) FIMO: scanning for occurrences of a given motif.  
702 *Bioinformatics* 27, 1017-1018.

703 Grimaldi, B, Bellet, MM, Katada, S, Astarita, G, Hirayama, J, Amin, RH, Granneman, JG, Piomelli,  
704 D, Leff, T, Sassone-Corsi, P (2010) PER2 controls lipid metabolism by direct regulation of  
705 PPARgamma. *Cell Metab* 12, 509-520.

706 Harding, SV, Bateman, KP, Kennedy, BP, Rideout, TC, Jones, PJ (2015) Desaturation index versus  
707 isotopically measured de novo lipogenesis as an indicator of acute systemic lipogenesis. *BMC*  
708 *Res Notes* 8, 49.

709 Hüppop, K (2001) How do cave animals cope with food scarcity in caves? . In: Wilkens, H,  
710 Culver, DC and Humphreys, WF, Eds, *Subterranean Ecosystems*, Elsevier Press, Amsterdam 417-  
711 432.

712 Kersten, S (2001) Mechanisms of nutritional and hormonal regulation of lipogenesis. *EMBO Rep*  
713 *2*, 282-286.

714 Kim, BM, Amores, A, Kang, S, Ahn, DH, Kim, JH, Kim, IC, Lee, JH, Lee, SG, Lee, H, Lee, J, Kim, HW,  
715 Desvignes, T, Batzel, P, Sydes, J, Titus, T, Wilson, CA, Catchen, JM, Warren, WC, Schartl, M,  
716 Detrich, HW, 3rd, Postlethwait, JH, Park, H (2019) Antarctic blackfin icefish genome reveals  
717 adaptations to extreme environments. *Nature ecology & evolution* *3*, 469-478.

718 Kingsley, MCS, Nagy, JA, Russell, RH (1983) Patterns of weight gain and loss for grizzly bears in  
719 northern Canada. *Bears: Their Biology and Management* *5*: 174-178.

720 Klawitter, J, Bek, S, Zakaria, M, Zeng, C, Hornberger, A, Gilbert, R, Shokati, T, Klawitter, J,  
721 Christians, U, Boernsen, KO (2014) Fatty acid desaturation index in human plasma: comparison  
722 of different analytical methodologies for the evaluation of diet effects. *Anal Bioanal Chem* *406*,  
723 6399-6408.

724 Kliewer, SA, Sundseth, SS, Jones, SA, Brown, PJ, Wisely, GB, Koble, CS, Devchand, P, Wahli, W,  
725 Willson, TM, Lenhard, JM, Lehmann, JM (1997) Fatty acids and eicosanoids regulate gene  
726 expression through direct interactions with peroxisome proliferator-activated receptors alpha  
727 and gamma. *Proc Natl Acad Sci U S A* *94*, 4318-4323.

728 Krey, G, Braissant, O, L'Horset, F, Kalkhoven, E, Perroud, M, Parker, MG, Wahli, W (1997) Fatty  
729 acids, eicosanoids, and hypolipidemic agents identified as ligands of peroxisome proliferator-  
730 activated receptors by coactivator-dependent receptor ligand assay. *Mol Endocrinol* *11*, 779-  
731 791.

732 Lawrence, M, Gentleman, R, Carey, V (2009) rtracklayer: an R package for interfacing with  
733 genome browsers. *Bioinformatics* *25*, 1841-1842.

734 Lawrence, M, Huber, W, Pages, H, Aboyoun, P, Carlson, M, Gentleman, R, Morgan, MT, Carey,  
735 VJ (2013) Software for computing and annotating genomic ranges. *PLoS computational biology*  
736 *9*, e1003118.

737 Lee, YJ, Ko, EH, Kim, JE, Kim, E, Lee, H, Choi, H, Yu, JH, Kim, HJ, Seong, JK, Kim, KS, Kim, JW  
738 (2012) Nuclear receptor PPARgamma-regulated monoacylglycerol O-acyltransferase 1 (MGAT1)  
739 expression is responsible for the lipid accumulation in diet-induced hepatic steatosis. *Proc Natl*  
740 *Acad Sci U S A* *109*, 13656-13661.

741 Mack, KL, Jaggard, JB, Persons, JL, Passow, CN, Stanhope, BA, Ferrufino, E, Tsuchiya, D, Smith,  
742 SE, Slaughter, BD, Kowalko, J, Rohner, N, Keene, AC, McGaugh, SE (2020) Repeated evolution of  
743 circadian clock dysregulation in cavefish populations. *bioRxiv* *2020.01.14.906628*.

744 Medina-Gomez, G, Gray, SL, Yetukuri, L, Shimomura, K, Virtue, S, Campbell, M, Curtis, RK,  
745 Jimenez-Linan, M, Blount, M, Yeo, GS, Lopez, M, Seppanen-Laakso, T, Ashcroft, FM, Oresic, M,  
746 Vidal-Puig, A (2007) PPAR gamma 2 prevents lipotoxicity by controlling adipose tissue  
747 expandability and peripheral lipid metabolism. *PLoS Genet* *3*, e64.

748 Medley, JK, Persons, J, Peuss, R, Olsen, L, Xiong, S, Rohner, N (2020) Untargeted Metabolomics  
749 of the Cavefish *Astyanax mexicanus* Reveals the Basis of Metabolic Strategies in Adaptation to  
750 Extreme Conditions. *bioRxiv* *2020.10.27.358077*.

751 Mitchell, RW, Russell, WH, Elliott, WR (1977) Mexican eyeless characin fishes, genus *Astyanax* :  
752 environment, distribution, and evolution (Lubbock, Texas Tech Press).

753 Moran, D, Softley, R, Warrant, EJ (2014) Eyeless Mexican cavefish save energy by eliminating  
754 the circadian rhythm in metabolism. *PLoS One* 9, e107877.

755 Ntambi, JM, Miyazaki, M (2004) Regulation of stearoyl-CoA desaturases and role in metabolism.  
756 *Prog Lipid Res* 43, 91-104.

757 Ntambi, JM, Miyazaki, M, Stoehr, JP, Lan, H, Kendziorski, CM, Yandell, BS, Song, Y, Cohen, P,  
758 Friedman, JM, Attie, AD (2002) Loss of stearoyl-CoA desaturase-1 function protects mice against  
759 adiposity. *Proc Natl Acad Sci U S A* 99, 11482-11486.

760 Numa, S, Yamashita, S (1974) Regulation of lipogenesis in animal tissues. *Curr Top Cell Regul* 8,  
761 197-246.

762 Pettinelli, P, Videla, LA (2011) Up-regulation of PPAR-gamma mRNA expression in the liver of  
763 obese patients: an additional reinforcing lipogenic mechanism to SREBP-1c induction. *J Clin*  
764 *Endocrinol Metab* 96, 1424-1430.

765 Quinlan, AR, Hall, IM (2010) BEDTools: a flexible suite of utilities for comparing genomic  
766 features. *Bioinformatics* 26, 841-842.

767 Riddle, MR, Boesmans, W, Caballero, O, Kazwiny, Y, Tabin, CJ (2018) Morphogenesis and  
768 motility of the *Astyanax mexicanus* gastrointestinal tract. *Developmental biology* 441, 285-296.

769 Rinella, ME (2015) Nonalcoholic fatty liver disease: a systematic review. *Jama* 313, 2263-2273.

770 Schadinger, SE, Bucher, NL, Schreiber, BM, Farmer, SR (2005) PPARgamma2 regulates  
771 lipogenesis and lipid accumulation in steatotic hepatocytes. *Am J Physiol Endocrinol Metab* 288,  
772 E1195-1205.

773 Sharma, AM, Staels, B (2007) Review: Peroxisome proliferator-activated receptor gamma and  
774 adipose tissue--understanding obesity-related changes in regulation of lipid and glucose  
775 metabolism. *J Clin Endocrinol Metab* 92, 386-395.

776 Tontonoz, P, Spiegelman, BM (2008) Fat and beyond: the diverse biology of PPARgamma.  
777 *Annual review of biochemistry* 77, 289-312.

778 Varga, T, Czimmerer, Z, Nagy, L (2011) PPARs are a unique set of fatty acid regulated  
779 transcription factors controlling both lipid metabolism and inflammation. *Biochim Biophys Acta*  
780 1812, 1007-1022.

781 Vernon, G, Baranova, A, Younossi, ZM (2011) Systematic review: the epidemiology and natural  
782 history of non-alcoholic fatty liver disease and non-alcoholic steatohepatitis in adults.  
783 *Alimentary pharmacology & therapeutics* 34, 274-285.

784 Wang, Y, Viscarra, J, Kim, SJ, Sul, HS (2015) Transcriptional regulation of hepatic lipogenesis. *Nat*  
785 *Rev Mol Cell Biol* 16, 678-689.

786 Wolf Greenstein, A, Majumdar, N, Yang, P, Subbaiah, PV, Kineman, RD, Cordoba-Chacon, J  
787 (2017) Hepatocyte-specific, PPARgamma-regulated mechanisms to promote steatosis in adult  
788 mice. *J Endocrinol* 232, 107-121.

789 Xiong, S, Krishnan, J, Peuss, R, Rohner, N (2018) Early adipogenesis contributes to excess fat  
790 accumulation in cave populations of *Astyanax mexicanus*. *Developmental biology* 441, 297-304.

791 Yates, AD, Achuthan, P, Akanni, W, Allen, J, Allen, J, Alvarez-Jarreta, J, Amode, MR, Armean, IM,  
792 Azov, AG, Bennett, R, Bhai, J, Billis, K, Boddu, S, Marugan, JC, Cummins, C, Davidson, C, Dodiya,  
793 K, Fatima, R, Gall, A, Giron, CG, Gil, L, Grego, T, Haggerty, L, Haskell, E, Hourlier, T, Izuogu, OG,  
794 Janacek, SH, Juettemann, T, Kay, M, Lavidas, I, Le, T, Lemos, D, Martinez, JG, Maurel, T,  
795 McDowall, M, McMahon, A, Mohanan, S, Moore, B, Nuhn, M, Oheh, DN, Parker, A, Parton, A,  
796 Patricio, M, Sakthivel, MP, Abdul Salam, AI, Schmitt, BM, Schuilenburg, H, Sheppard, D,

797 Sycheva, M, Szuba, M, Taylor, K, Thormann, A, Threadgold, G, Vullo, A, Walts, B, Winterbottom,  
798 A, Zadissa, A, Chakiachvili, M, Flint, B, Frankish, A, Hunt, SE, G, II, Kostadima, M, Langridge, N,  
799 Loveland, JE, Martin, FJ, Morales, J, Mudge, JM, Muffato, M, Perry, E, Ruffier, M, Trevanion, SJ,  
800 Cunningham, F, Howe, KL, Zerbino, DR, Flicek, P (2020) Ensembl 2020. *Nucleic Acids Res* *48*,  
801 D682-D688.

802 Yu, G, Wang, LG, He, QY (2015) ChIPseeker: an R/Bioconductor package for ChIP peak  
803 annotation, comparison and visualization. *Bioinformatics* *31*, 2382-2383.

804 Yu, S, Matsusue, K, Kashireddy, P, Cao, WQ, Yeldandi, V, Yeldandi, AV, Rao, MS, Gonzalez, FJ,  
805 Reddy, JK (2003) Adipocyte-specific gene expression and adipogenic steatosis in the mouse liver  
806 due to peroxisome proliferator-activated receptor gamma1 (PPARgamma1) overexpression. *J*  
807 *Biol Chem* *278*, 498-505.

808 Zhang, Y, Liu, T, Meyer, CA, Eeckhoute, J, Johnson, DS, Bernstein, BE, Nusbaum, C, Myers, RM,  
809 Brown, M, Li, W, Liu, XS (2008) Model-based analysis of ChIP-Seq (MACS). *Genome Biol* *9*, R137.

810 Zhou, J, Febbraio, M, Wada, T, Zhai, Y, Kuruba, R, He, J, Lee, JH, Khadem, S, Ren, S, Li, S,  
811 Silverstein, RL, Xie, W (2008) Hepatic fatty acid transporter Cd36 is a common target of LXR,  
812 PXR, and PPARgamma in promoting steatosis. *Gastroenterology* *134*, 556-567.

813 Zhou, Y, Zhou, B, Pache, L, Chang, M, Khodabakhshi, AH, Tanaseichuk, O, Benner, C, Chanda, SK  
814 (2019) Metascape provides a biologist-oriented resource for the analysis of systems-level  
815 datasets. *Nat Commun* *10*, 1523.

816
